# Supplementary material for: Constructing an atlas of associations between polygenic scores from across the human phenome and circulating metabolic biomarkers
Source: eLife. 2022 Oct 11;11:e73951. doi: 10.7554/eLife.73951 (PMC9553209; doi:10.7554/eLife.73951)
Supplement: Supplementary file 1. — (a) Genome-wide association studies used to derive weights for polygenic risk scores in this study. (b) Metabolic traits analyses in this study from the UK Biobank nuclear magnetic resonance (NMR) panel. (c) Principal component analysis of the NMR metabolites data. (d) Associations with the body mass index polygenic risk score. (e) Mendelian randomization results with very low-density lipoprotein (VLDL) particle size as the exposure and complex traits as the outcome. (f) Polygenic risk scores association for 125 complex traits with glycoprotein acetyls levels. (g) Mendelian randomization results for complex traits and disease liability with glycoprotein acetyls as an outcome. (h) Mendelian randomization results using weighted median and MR-Egger for complex traits and disease liability with glycoprotein acetyls as an outcome. (i) Genetic instruments for glycoprotein acetyls. (j) Mendelian randomization results with glycoprotein acetyls as our exposure and complex traits/diseases as our outcome. (k) Genetic instruments for five proteins contributing to NMR signal of glycoprotein acetyls. (l) Mendelian randomization results with each of the five acute-phase proteins as the exposure and complex traits/diseases as the outcome. (m) Mendelian randomization results using alpha1-antitrypsin as the exposure and gamma glutamyl transferase as the outcome. (n) Associations with the coronary artery disease polygenic score in the full sample. (o) Associations with the coronary artery disease polygenic risk score in the youngest and oldest age tertiles. (p) List of lipid-associated genes removed from polygenic scores in sensitivity analysis. (q) Associations with the Alzheimer’s disease polygenic risk score. (r) Associations with the Alzheimer’s disease polygenic risk score (excluding lipid loci). [file elife-73951-supp1.xlsx]

## Sheet: 1a
Supplementary File 1a: Genome-wide association studies used to derive weights for polygenic risk scores in this study
MR-Base ID	Trait	Subcategory	Year	Author	Sample size	Pubmed ID
ieu-a-29	Birth length	Anthropometric	2015	van der Valk RJ	28459	25281659
ieu-a-999	Body fat	Anthropometric	2016	Lu	100716	26833246
ieu-a-2	Body mass index	Anthropometric	2015	Locke AE	339224	25673413
ieu-a-48	Hip circumference	Anthropometric	2015	Shungin D	224459	25673412
ieu-a-28	Infant head circumference	Anthropometric	2012	Taal HR	10768	22504419
ieu-a-93	Overweight	Anthropometric	2013	Berndt SI	158855	23563607
ieu-a-1070	Sitting height ratio	Anthropometric	2015	Chan	21590	25865494
ieu-a-60	Waist circumference	Anthropometric	2015	Shungin D	224459	25673412
ieu-a-72	Waist-to-hip ratio	Anthropometric	2015	Shungin D	224459	25673412
ebi-a-GCST006862	Asthma	Autoimmune / inflammatory	2017	Demenais F	127669	29273806
ieu-a-276	Celiac disease	Autoimmune / inflammatory	2010	Dubois PC	15283	20190752
ebi-a-GCST004132	Crohn's disease	Autoimmune / inflammatory	2017	de Lange KM	40266	28067908
ieu-a-996	Eczema	Autoimmune / inflammatory	2014	Paternoster	40835	26482879
ieu-a-1054	Gout	Autoimmune / inflammatory	2013	Kottgen	69374	23263486
ebi-a-GCST004131	Inflammatory bowel disease	Autoimmune / inflammatory	2017	de Lange KM	59957	28067908
ieu-a-832	Rheumatoid arthritis	Autoimmune / inflammatory	2014	Okada Y	58284	24390342
ebi-a-GCST004133	Ulcerative colitis	Autoimmune / inflammatory	2017	de Lange KM	45975	28067908
ieu-a-1	Adiponectin	Blood biomarker	2012	Dastani Z	39883	22479202
ebi-a-GCST004940	Alanine transaminase levels	Blood biomarker	2017	Prins BP	9731	28887542
ebi-a-GCST005064	Aspartate aminotransferase levels	Blood biomarker	2017	Prins BP	9463	28887542
ieu-b-35	C-Reactive protein levels	Blood biomarker	2018	Ligthart, S	204402	30388399
ebi-a-GCST004420	CTACK levels	Blood biomarker	2016	Ahola-Olli AV	3631	27989323
ebi-a-GCST004941	Dehydroepiandrosterone sulphate levels	Blood biomarker	2017	Prins BP	9722	28887542
ebi-a-GCST004460	Eotaxin levels	Blood biomarker	2016	Ahola-Olli AV	8153	27989323
ebi-a-GCST005072	Ferritin levels	Blood biomarker	2017	Prins BP	9818	28887542
ebi-a-GCST005062	Fibrinogen levels	Blood biomarker	2017	Prins BP	9762	28887542
ebi-a-GCST004459	Fibroblast growth factor basic levels	Blood biomarker	2016	Ahola-Olli AV	7565	27989323
ebi-a-GCST005069	Gamma glutamyl transferase levels	Blood biomarker	2017	Prins BP	9747	28887542
ebi-a-GCST004457	Growth-regulated protein alpha levels	Blood biomarker	2016	Ahola-Olli AV	3505	27989323
ebi-a-GCST005060	Hemoglobin levels	Blood biomarker	2017	Prins BP	9667	28887542
ebi-a-GCST004449	Hepatocyte growth factor levels	Blood biomarker	2016	Ahola-Olli AV	8292	27989323
ebi-a-GCST005071	Insulin-like growth factor 1 levels	Blood biomarker	2017	Prins BP	9732	28887542
ebi-a-GCST004440	Interferon gamma-induced protein 10 levels	Blood biomarker	2016	Ahola-Olli AV	3685	27989323
ebi-a-GCST004444	Interleukin-10 levels	Blood biomarker	2016	Ahola-Olli AV	7681	27989323
ebi-a-GCST004439	Interleukin-12p70 levels	Blood biomarker	2016	Ahola-Olli AV	8270	27989323
ebi-a-GCST004430	Interleukin-16 levels	Blood biomarker	2016	Ahola-Olli AV	3483	27989323
ebi-a-GCST004441	Interleukin-18 levels	Blood biomarker	2016	Ahola-Olli AV	3636	27989323
ebi-a-GCST004454	Interleukin-2 receptor antagonist levels	Blood biomarker	2016	Ahola-Olli AV	3677	27989323
ieu-a-1002	Leptin	Blood biomarker	2016	Kilpelainen	32161	26833098
ebi-a-GCST004436	Macrophage colony stimulating factor levels	Blood biomarker	2016	Ahola-Olli AV	840	27989323
ebi-a-GCST004433	Macrophage inflammatory protein 1b levels	Blood biomarker	2016	Ahola-Olli AV	8243	27989323
ebi-a-GCST004423	Macrophage Migration Inhibitory Factor levels	Blood biomarker	2016	Ahola-Olli AV	3494	27989323
ebi-a-GCST004438	Monocyte chemoattractant protein-1 levels	Blood biomarker	2016	Ahola-Olli AV	8293	27989323
ebi-a-GCST004437	Monocyte chemoattractant protein-3 levels	Blood biomarker	2016	Ahola-Olli AV	843	27989323
ebi-a-GCST004435	Monokine induced by gamma interferon levels	Blood biomarker	2016	Ahola-Olli AV	3685	27989323
ieu-a-1012	Plasma cortisol	Blood biomarker	2014	Bolton JL	12597	25010111
ebi-a-GCST004432	Platelet-derived growth factor BB levels	Blood biomarker	2016	Ahola-Olli AV	8293	27989323
ebi-a-GCST005059	Serum albumin level	Blood biomarker	2017	Prins BP	9824	28887542
ebi-a-GCST005061	Serum alkaline phosphatase levels	Blood biomarker	2017	Prins BP	9733	28887542
ebi-a-GCST004427	Stromal-cell-derived factor 1 alpha levels	Blood biomarker	2016	Ahola-Olli AV	5998	27989323
ebi-a-GCST005074	Testosterone levels	Blood biomarker	2017	Prins BP	4259	28887542
ebi-a-GCST004424	TRAIL levels	Blood biomarker	2016	Ahola-Olli AV	8186	27989323
ebi-a-GCST004425	Tumor necrosis factor beta levels	Blood biomarker	2016	Ahola-Olli AV	1559	27989323
ebi-a-GCST005070	Urea levels	Blood biomarker	2017	Prins BP	9818	28887542
ebi-a-GCST004422	Vascular endothelial growth factor levels	Blood biomarker	2016	Ahola-Olli AV	7118	27989323
ebi-a-GCST005367	Vitamin D levels	Blood biomarker	2018	Jiang X	79366	29343764
ieu-a-1126	Breast cancer	Cancer	2017	Michailidou K	228951	29059683
ebi-a-GCST006464	Endometrial cancer	Cancer	2018	O'Mara TA	121885	30093612
ieu-a-1125	Endometrioid ovarian cancer	Cancer	2017	Phelan	43751	28346442
ieu-a-1128	ER- Breast cancer	Cancer	2017	Michailidou K	127442	29059683
ieu-a-1127	ER+ Breast cancer	Cancer	2017	Michailidou K	175475	29059683
ieu-a-965	Lung adenocarcinoma	Cancer	2014	Wang Y	18336	24880342
ieu-a-966	Lung cancer	Cancer	2014	Wang Y	27209	24880342
ieu-b-94	Oral cancer	Cancer	2016	Lesseur	4151	27749845
ieu-b-90	Oral cavity and pharyngeal cancer	Cancer	2016	Lesseur	4671	27749845
ieu-b-97	Oropharyngeal cancer	Cancer	2016	Lesseur	3448	27749845
ieu-a-1120	Ovarian cancer	Cancer	2017	Phelan	66450	28346442
ieu-a-822	Pancreatic cancer	Cancer	2009	Amundadottir L	3835	19648918
ieu-b-85	Prostate cancer	Cancer	2018	Schumacher	140254	29892016
ieu-a-967	Squamous cell lung cancer	Cancer	2014	Wang Y	18313	24880342
ieu-a-7	Coronary heart disease	Cardiovascular	2015	Nikpay	184305	26343387
ieu-a-1056	Heart rate	Cardiovascular	2013	den Hoed M	92355	23583979
ebi-a-GCST006908	Ischemic stroke	Cardiovascular	2018	Malik R	440328	29531354
ebi-a-GCST006910	Ischemic stroke (cardioembolic)	Cardiovascular	2018	Malik R	211763	29531354
ebi-a-GCST006907	Ischemic stroke (large artery atherosclerosis)	Cardiovascular	2018	Malik R	150765	29531354
ebi-a-GCST006909	Ischemic stroke (small-vessel)	Cardiovascular	2018	Malik R	198048	29531354
ieu-a-798	Myocardial infarction	Cardiovascular	2015	Nikpay	171875	26343387
ieu-a-275	Red blood cell count	Cardiovascular	2012	van der Harst P	66214	23222517
ebi-a-GCST006906	Stroke	Cardiovascular	2018	Malik R	446696	29531354
ebi-a-GCST004575	Acute insulin response	Diabetes	2017	Wood AR	2087	28490609
Lagou_FG	Fasting glucose	Diabetes	2021	Lagou V	151188	33402679
Lagou_FI	Fasting insulin	Diabetes	2021	Lagou V	105056	33402679
Wheeler_HbA1c	HbA1c	Diabetes	2017	Wheeler E	159940	28898252
ebi-a-GCST005219	Incremental insulin	Diabetes	2014	Prokopenko I	4447	24699409
Walford_ISI	Insulin sensitivity index	Diabetes	2016	Walford GA	16753	27416945
Censin_T1D	Type 1 diabetes	Diabetes	2017	Censin JC	14741	28763444
Mahajan_T2D	Type 2 diabetes	Diabetes	2018	Mahajan A	177090	30297969
ieu-a-1102	Chronic kidney disease	Kidney function	2015	Pattaro	117165	26831199
ebi-a-GCST005066	Creatinine levels	Kidney function	2017	Prins BP	9803	28887542
ebi-a-GCST005063	Glomerular filtration rate	Kidney function	2017	Prins BP	9961	28887542
ieu-a-1097	Microalbuminuria	Kidney function	2015	Teumer	54116	26631737
ieu-a-1104	Serum creatinine (eGFRcrea)	Kidney function	2015	Pattaro	118460	26831199
ieu-a-1106	Serum cystatin C (eGFRcys)	Kidney function	2015	Pattaro	33152	26831199
ieu-a-1100	Urinary albumin-to-creatinine ratio	Kidney function	2015	Teumer	5825	26631737
ieu-a-1095	Age at menarche	Miscellaneous	2014	Perry JR	182416	25231870
ieu-a-1004	Age at menopause	Miscellaneous	2015	Day	69360	26414677
ieu-a-813	Alcohol dependence	Miscellaneous	2012	Olfson	3829	22978509
Liu_CigarettesPerDay	Cigarettes per day	Miscellaneous	2019	Liu M	337334	30643251
Liu_DrinksPerWeek	Drinks per week	Miscellaneous	2019	Liu M	941280	30643251
ebi-a-GCST001592	Osteoarthritis	Miscellaneous	2012	Zeggini E	18419	22763110
ieu-a-975	Paget's disease	Miscellaneous	2011	Albagha OM	3440	21623375
ieu-a-1005	Percent emphysema	Miscellaneous	2014	Manichaikul A	7667	24383474
Liu_SmokingCessation	Smoking cessation	Miscellaneous	2019	Liu M	547219	30643251
Liu_SmokingInitiation	Smoking initation	Miscellaneous	2019	Liu M	1232091	30643251
ieu-b-2	Alzheimer's disease	Psychiatric / neurological	2019	Kunkle BW	63926	30820047
ieu-a-1043	Amygdala volume	Psychiatric / neurological	2015	Hibar	30717	25607358
ebi-a-GCST004692	Amyotrophic lateral sclerosis	Psychiatric / neurological	2016	van Rheenen W	36052	27455348
ieu-a-45	Anorexia nervosa	Psychiatric / neurological	2014	Boraska V	17767	24514567
ieu-a-806	Autism	Psychiatric / neurological	2015		10263
ieu-b-41	Bipolar disorder	Psychiatric / neurological	2019	Stahl, E	51710	31043756
ieu-a-990	Bulimia nervosa	Psychiatric / neurological	2013	Wade TD	2442	23568457
ieu-a-1044	Caudate volume	Psychiatric / neurological	2015	Hibar	30717	25607358
ieu-b-8	Epilepsy	Psychiatric / neurological	2018	Abou-Khalil B	44889	30531953
ieu-b-43	Frontotemporal dementia (TDP subtype)	Psychiatric / neurological	2010	Van Deerlin,V	3024	20154673
ieu-b-9	Generalized epilepsy	Psychiatric / neurological	2018	Abou-Khalil B	33446	30531953
ieu-a-1045	Hippocampus volume	Psychiatric / neurological	2015	Hibar	30717	25607358
ieu-a-1041	Intracranial volume	Psychiatric / neurological	2015	Hibar	30717	25607358
ieu-b-17	Juvenile myoclonic epilepsy	Psychiatric / neurological	2018	Abou-Khalil B	30858	30531953
ieu-a-1042	Nucleus accumbens volume	Psychiatric / neurological	2015	Hibar	30717	25607358
ieu-a-1046	Pallidum volume	Psychiatric / neurological	2015	Hibar	30717	25607358
ieu-b-7	Parkinson's disease	Psychiatric / neurological	2019	Nalls MA	482730
ieu-a-803	PGC cross-disorder traits	Psychiatric / neurological	2013	Smoller JW	61220	23453885
ieu-a-1047	Putamen volume	Psychiatric / neurological	2015	Hibar	30717	25607358
ieu-a-22	Schizophrenia	Psychiatric / neurological	2014	Ripke S	82315	25056061
ieu-a-1048	Thalamus volume	Psychiatric / neurological	2015	Hibar	30717	25607358

## Sheet: 1b
Supplementary File 1b: Metabolic traits analyses in this study from the UK Biobank NMR panel
Metabolite	Description	Subcategory
Ala	Alanine	Amino acids
Gln	Glutamine	Amino acids
Gly	Glycine	Amino acids
His	Histidine	Amino acids
Ile	Isoleucine	Amino acids
Leu	Leucine	Amino acids
Phe	Phenylalanine	Amino acids
Total_BCAA	Total Concentration of Branched-Chain Amino Acids (Leucine + Isoleucine + Valine)	Amino acids
Tyr	Tyrosine	Amino acids
Val	Valine	Amino acids
ApoA1	Apolipoprotein A1	Apolipoproteins
ApoB	Apolipoprotein B	Apolipoproteins
ApoB_by_ApoA1	Apolipoprotein B to Apolipoprotein A1 ratio	Apolipoproteins
Clinical_LDL_C	Clinical LDL Cholesterol	Cholesterol (major classes)
HDL_C	HDL Cholesterol	Cholesterol (major classes)
LDL_C	LDL Cholesterol	Cholesterol (major classes)
non_HDL_C	Total Cholesterol Minus HDL-C	Cholesterol (major classes)
Remnant_C	Remnant Cholesterol (Non-HDL, Non-LDL -Cholesterol)	Cholesterol (major classes)
Total_C	Total Cholesterol	Cholesterol (major classes)
VLDL_C	VLDL Cholesterol	Cholesterol (major classes)
IDL_C	Cholesterol in IDL	Cholesterol (subclasses)
L_HDL_C	Cholesterol in Large HDL	Cholesterol (subclasses)
L_LDL_C	Cholesterol in Large LDL	Cholesterol (subclasses)
L_VLDL_C	Cholesterol in Large VLDL	Cholesterol (subclasses)
M_HDL_C	Cholesterol in Medium HDL	Cholesterol (subclasses)
M_LDL_C	Cholesterol in Medium LDL	Cholesterol (subclasses)
M_VLDL_C	Cholesterol in Medium VLDL	Cholesterol (subclasses)
S_HDL_C	Cholesterol in Small HDL	Cholesterol (subclasses)
S_LDL_C	Cholesterol in Small LDL	Cholesterol (subclasses)
S_VLDL_C	Cholesterol in Small VLDL	Cholesterol (subclasses)
XL_HDL_C	Cholesterol in Very Large HDL	Cholesterol (subclasses)
XL_VLDL_C	Cholesterol in Very Large VLDL	Cholesterol (subclasses)
XS_VLDL_C	Cholesterol in Very Small VLDL	Cholesterol (subclasses)
XXL_VLDL_C	Cholesterol in Chylomicrons and Extremely Large VLDL	Cholesterol (subclasses)
IDL_C_pct	Cholesterol to Total Lipids in IDL percentage	Cholesterol % (subclasses)
L_HDL_C_pct	Cholesterol to Total Lipids in Large HDL percentage	Cholesterol % (subclasses)
L_LDL_C_pct	Cholesterol to Total Lipids in Large LDL percentage	Cholesterol % (subclasses)
L_VLDL_C_pct	Cholesterol to Total Lipids in Large VLDL percentage	Cholesterol % (subclasses)
M_HDL_C_pct	Cholesterol to Total Lipids in Medium HDL percentage	Cholesterol % (subclasses)
M_LDL_C_pct	Cholesterol to Total Lipids in Medium LDL percentage	Cholesterol % (subclasses)
M_VLDL_C_pct	Cholesterol to Total Lipids in Medium VLDL percentage	Cholesterol % (subclasses)
S_HDL_C_pct	Cholesterol to Total Lipids in Small HDL percentage	Cholesterol % (subclasses)
S_LDL_C_pct	Cholesterol to Total Lipids in Small LDL percentage	Cholesterol % (subclasses)
S_VLDL_C_pct	Cholesterol to Total Lipids in Small VLDL percentage	Cholesterol % (subclasses)
XL_HDL_C_pct	Cholesterol to Total Lipids in Very Large HDL percentage	Cholesterol % (subclasses)
XL_VLDL_C_pct	Cholesterol to Total Lipids in Very Large VLDL percentage	Cholesterol % (subclasses)
XS_VLDL_C_pct	Cholesterol to Total Lipids in Very Small VLDL percentage	Cholesterol % (subclasses)
XXL_VLDL_C_pct	Cholesterol to Total Lipids in Chylomicrons and Extremely Large VLDL percentage	Cholesterol % (subclasses)
HDL_CE	Cholesteryl Esters in HDL	Cholesteryl esters (major classes)
LDL_CE	Cholesteryl Esters in LDL	Cholesteryl esters (major classes)
Total_CE	Total Esterified Cholesterol	Cholesteryl esters (major classes)
VLDL_CE	Cholesteryl Esters in VLDL	Cholesteryl esters (major classes)
IDL_CE	Cholesteryl Esters in IDL	Cholesteryl esters (subclasses)
L_HDL_CE	Cholesteryl Esters in Large HDL	Cholesteryl esters (subclasses)
L_LDL_CE	Cholesteryl Esters in Large LDL	Cholesteryl esters (subclasses)
L_VLDL_CE	Cholesteryl Esters in Large VLDL	Cholesteryl esters (subclasses)
M_HDL_CE	Cholesteryl Esters in Medium HDL	Cholesteryl esters (subclasses)
M_LDL_CE	Cholesteryl Esters in Medium LDL	Cholesteryl esters (subclasses)
M_VLDL_CE	Cholesteryl Esters in Medium VLDL	Cholesteryl esters (subclasses)
S_HDL_CE	Cholesteryl Esters in Small HDL	Cholesteryl esters (subclasses)
S_LDL_CE	Cholesteryl Esters in Small LDL	Cholesteryl esters (subclasses)
S_VLDL_CE	Cholesteryl Esters in Small VLDL	Cholesteryl esters (subclasses)
XL_HDL_CE	Cholesteryl Esters in Very Large HDL	Cholesteryl esters (subclasses)
XL_VLDL_CE	Cholesteryl Esters in Very Large VLDL	Cholesteryl esters (subclasses)
XS_VLDL_CE	Cholesteryl Esters in Very Small VLDL	Cholesteryl esters (subclasses)
XXL_VLDL_CE	Cholesteryl Esters in Chylomicrons and Extremely Large VLDL	Cholesteryl esters (subclasses)
IDL_CE_pct	Cholesteryl Esters to Total Lipids in IDL percentage	Cholesteryl esters % (subclasses)
L_HDL_CE_pct	Cholesteryl Esters to Total Lipids in Large HDL percentage	Cholesteryl esters % (subclasses)
L_LDL_CE_pct	Cholesteryl Esters to Total Lipids in Large LDL percentage	Cholesteryl esters % (subclasses)
L_VLDL_CE_pct	Cholesteryl Esters to Total Lipids in Large VLDL percentage	Cholesteryl esters % (subclasses)
M_HDL_CE_pct	Cholesteryl Esters to Total Lipids in Medium HDL percentage	Cholesteryl esters % (subclasses)
M_LDL_CE_pct	Cholesteryl Esters to Total Lipids in Medium LDL percentage	Cholesteryl esters % (subclasses)
M_VLDL_CE_pct	Cholesteryl Esters to Total Lipids in Medium VLDL percentage	Cholesteryl esters % (subclasses)
S_HDL_CE_pct	Cholesteryl Esters to Total Lipids in Small HDL percentage	Cholesteryl esters % (subclasses)
S_LDL_CE_pct	Cholesteryl Esters to Total Lipids in Small LDL percentage	Cholesteryl esters % (subclasses)
S_VLDL_CE_pct	Cholesteryl Esters to Total Lipids in Small VLDL percentage	Cholesteryl esters % (subclasses)
XL_HDL_CE_pct	Cholesteryl Esters to Total Lipids in Very Large HDL percentage	Cholesteryl esters % (subclasses)
XL_VLDL_CE_pct	Cholesteryl Esters to Total Lipids in Very Large VLDL percentage	Cholesteryl esters % (subclasses)
XS_VLDL_CE_pct	Cholesteryl Esters to Total Lipids in Very Small VLDL percentage	Cholesteryl esters % (subclasses)
XXL_VLDL_CE_pct	Cholesteryl Esters to Total Lipids in Chylomicrons and Extremely Large VLDL percentage	Cholesteryl esters % (subclasses)
DHA	Docosahexaenoic Acid	Fatty acids
LA	Linoleic Acid	Fatty acids
MUFA	Monounsaturated Fatty Acids	Fatty acids
Omega_3	Omega-3 Fatty Acids	Fatty acids
Omega_6	Omega-6 Fatty Acids	Fatty acids
PUFA	Polyunsaturated Fatty Acids	Fatty acids
SFA	Saturated Fatty Acids	Fatty acids
Total_FA	Total Fatty Acids	Fatty acids
DHA_pct	Docosahexaenoic Acid to Total Fatty Acids percentage	Fatty acids (%)
LA_pct	Linoleic Acid to Total Fatty Acids percentage	Fatty acids (%)
MUFA_pct	Monounsaturated Fatty Acids to Total Fatty Acids percentage	Fatty acids (%)
Omega_3_pct	Omega-3 Fatty Acids to Total Fatty Acids percentage	Fatty acids (%)
Omega_6_by_Omega_3	Omega-6 Fatty Acids to Omega-3 Fatty Acids ratio	Fatty acids (%)
Omega_6_pct	Omega-6 Fatty Acids to Total Fatty Acids percentage	Fatty acids (%)
PUFA_by_MUFA	Polyunsaturated Fatty Acids to Monounsaturated Fatty Acids ratio	Fatty acids (%)
PUFA_pct	Polyunsaturated Fatty Acids to Total Fatty Acids percentage	Fatty acids (%)
SFA_pct	Saturated Fatty Acids to Total Fatty Acids percentage	Fatty acids (%)
Unsaturation	Degree of Unsaturation	Fatty acids (%)
HDL_FC	Free Cholesterol in HDL	Free cholesterol (major classes)
LDL_FC	Free Cholesterol in LDL	Free cholesterol (major classes)
Total_FC	Total Free Cholesterol	Free cholesterol (major classes)
VLDL_FC	Free Cholesterol in VLDL	Free cholesterol (major classes)
IDL_FC	Free Cholesterol in IDL	Free cholesterol (subclasses)
L_HDL_FC	Free Cholesterol in Large HDL	Free cholesterol (subclasses)
L_LDL_FC	Free Cholesterol in Large LDL	Free cholesterol (subclasses)
L_VLDL_FC	Free Cholesterol in Large VLDL	Free cholesterol (subclasses)
M_HDL_FC	Free Cholesterol in Medium HDL	Free cholesterol (subclasses)
M_LDL_FC	Free Cholesterol in Medium LDL	Free cholesterol (subclasses)
M_VLDL_FC	Free Cholesterol in Medium VLDL	Free cholesterol (subclasses)
S_HDL_FC	Free Cholesterol in Small HDL	Free cholesterol (subclasses)
S_LDL_FC	Free Cholesterol in Small LDL	Free cholesterol (subclasses)
S_VLDL_FC	Free Cholesterol in Small VLDL	Free cholesterol (subclasses)
XL_HDL_FC	Free Cholesterol in Very Large HDL	Free cholesterol (subclasses)
XL_VLDL_FC	Free Cholesterol in Very Large VLDL	Free cholesterol (subclasses)
XS_VLDL_FC	Free Cholesterol in Very Small VLDL	Free cholesterol (subclasses)
XXL_VLDL_FC	Free Cholesterol in Chylomicrons and Extremely Large VLDL	Free cholesterol (subclasses)
IDL_FC_pct	Free Cholesterol to Total Lipids in IDL percentage	Free cholesterol % (subclasses)
L_HDL_FC_pct	Free Cholesterol to Total Lipids in Large HDL percentage	Free cholesterol % (subclasses)
L_LDL_FC_pct	Free Cholesterol to Total Lipids in Large LDL percentage	Free cholesterol % (subclasses)
L_VLDL_FC_pct	Free Cholesterol to Total Lipids in Large VLDL percentage	Free cholesterol % (subclasses)
M_HDL_FC_pct	Free Cholesterol to Total Lipids in Medium HDL percentage	Free cholesterol % (subclasses)
M_LDL_FC_pct	Free Cholesterol to Total Lipids in Medium LDL percentage	Free cholesterol % (subclasses)
M_VLDL_FC_pct	Free Cholesterol to Total Lipids in Medium VLDL percentage	Free cholesterol % (subclasses)
S_HDL_FC_pct	Free Cholesterol to Total Lipids in Small HDL percentage	Free cholesterol % (subclasses)
S_LDL_FC_pct	Free Cholesterol to Total Lipids in Small LDL percentage	Free cholesterol % (subclasses)
S_VLDL_FC_pct	Free Cholesterol to Total Lipids in Small VLDL percentage	Free cholesterol % (subclasses)
XL_HDL_FC_pct	Free Cholesterol to Total Lipids in Very Large HDL percentage	Free cholesterol % (subclasses)
XL_VLDL_FC_pct	Free Cholesterol to Total Lipids in Very Large VLDL percentage	Free cholesterol % (subclasses)
XS_VLDL_FC_pct	Free Cholesterol to Total Lipids in Very Small VLDL percentage	Free cholesterol % (subclasses)
XXL_VLDL_FC_pct	Free Cholesterol to Total Lipids in Chylomicrons and Extremely Large VLDL percentage	Free cholesterol % (subclasses)
Citrate	Citrate	Glycolysis related
Glucose	Glucose	Glycolysis related
Lactate	Lactate	Glycolysis related
Pyruvate	Pyruvate	Glycolysis related
GlycA	Glycoprotein Acetyls	Inflammation markers
Acetoacetate	Acetoacetate	Ketone bodies
bOHbutyrate	3-Hydroxybutyrate	Ketone bodies
Acetate	Acetate	Miscellaneous
Acetone	Acetone	Miscellaneous
Albumin	Albumin	Miscellaneous
Creatinine	Creatinine	Miscellaneous
HDL_size	Average Diameter for HDL Particles	Partical size
LDL_size	Average Diameter for LDL Particles	Partical size
VLDL_size	Average Diameter for VLDL Particles	Partical size
HDL_P	Concentration of HDL Particles	Particle concentrations (major classes)
LDL_P	Concentration of LDL Particles	Particle concentrations (major classes)
Total_P	Total Concentration of Lipoprotein Particles	Particle concentrations (major classes)
VLDL_P	Concentration of VLDL Particles	Particle concentrations (major classes)
IDL_P	Concentration of IDL Particles	Particle concentrations (subclasses)
L_HDL_P	Concentration of Large HDL Particles	Particle concentrations (subclasses)
L_LDL_P	Concentration of Large LDL Particles	Particle concentrations (subclasses)
L_VLDL_P	Concentration of Large VLDL Particles	Particle concentrations (subclasses)
M_HDL_P	Concentration of Medium HDL Particles	Particle concentrations (subclasses)
M_LDL_P	Concentration of Medium LDL Particles	Particle concentrations (subclasses)
M_VLDL_P	Concentration of Medium VLDL Particles	Particle concentrations (subclasses)
S_HDL_P	Concentration of Small HDL Particles	Particle concentrations (subclasses)
S_LDL_P	Concentration of Small LDL Particles	Particle concentrations (subclasses)
S_VLDL_P	Concentration of Small VLDL Particles	Particle concentrations (subclasses)
XL_HDL_P	Concentration of Very Large HDL Particles	Particle concentrations (subclasses)
XL_VLDL_P	Concentration of Very Large VLDL Particles	Particle concentrations (subclasses)
XS_VLDL_P	Concentration of Very Small VLDL Particles	Particle concentrations (subclasses)
XXL_VLDL_P	Concentration of Chylomicrons and Extremely Large VLDL Particles	Particle concentrations (subclasses)
Cholines	Total Cholines	Phospholipids
Phosphatidylc	Phosphatidylcholines	Phospholipids
Phosphoglyc	Phosphoglycerides	Phospholipids
Sphingomyelins	Sphingomyelins	Phospholipids
TG_by_PG	Triglycerides to Phosphoglycerides ratio	Phospholipids
HDL_PL	Phospholipids in HDL	Phospholipids (major classes)
LDL_PL	Phospholipids in LDL	Phospholipids (major classes)
Total_PL	Total Phospholipids in Lipoprotein Particles	Phospholipids (major classes)
VLDL_PL	Phospholipids in VLDL	Phospholipids (major classes)
IDL_PL	Phospholipids in IDL	Phospholipids (subclasses)
L_HDL_PL	Phospholipids in Large HDL	Phospholipids (subclasses)
L_LDL_PL	Phospholipids in Large LDL	Phospholipids (subclasses)
L_VLDL_PL	Phospholipids in Large VLDL	Phospholipids (subclasses)
M_HDL_PL	Phospholipids in Medium HDL	Phospholipids (subclasses)
M_LDL_PL	Phospholipids in Medium LDL	Phospholipids (subclasses)
M_VLDL_PL	Phospholipids in Medium VLDL	Phospholipids (subclasses)
S_HDL_PL	Phospholipids in Small HDL	Phospholipids (subclasses)
S_LDL_PL	Phospholipids in Small LDL	Phospholipids (subclasses)
S_VLDL_PL	Phospholipids in Small VLDL	Phospholipids (subclasses)
XL_HDL_PL	Phospholipids in Very Large HDL	Phospholipids (subclasses)
XL_VLDL_PL	Phospholipids in Very Large VLDL	Phospholipids (subclasses)
XS_VLDL_PL	Phospholipids in Very Small VLDL	Phospholipids (subclasses)
XXL_VLDL_PL	Phospholipids in Chylomicrons and Extremely Large VLDL	Phospholipids (subclasses)
IDL_PL_pct	Phospholipids to Total Lipids in IDL percentage	Phospholipids % (subclasses)
L_HDL_PL_pct	Phospholipids to Total Lipids in Large HDL percentage	Phospholipids % (subclasses)
L_LDL_PL_pct	Phospholipids to Total Lipids in Large LDL percentage	Phospholipids % (subclasses)
L_VLDL_PL_pct	Phospholipids to Total Lipids in Large VLDL percentage	Phospholipids % (subclasses)
M_HDL_PL_pct	Phospholipids to Total Lipids in Medium HDL percentage	Phospholipids % (subclasses)
M_LDL_PL_pct	Phospholipids to Total Lipids in Medium LDL percentage	Phospholipids % (subclasses)
M_VLDL_PL_pct	Phospholipids to Total Lipids in Medium VLDL percentage	Phospholipids % (subclasses)
S_HDL_PL_pct	Phospholipids to Total Lipids in Small HDL percentage	Phospholipids % (subclasses)
S_LDL_PL_pct	Phospholipids to Total Lipids in Small LDL percentage	Phospholipids % (subclasses)
S_VLDL_PL_pct	Phospholipids to Total Lipids in Small VLDL percentage	Phospholipids % (subclasses)
XL_HDL_PL_pct	Phospholipids to Total Lipids in Very Large HDL percentage	Phospholipids % (subclasses)
XL_VLDL_PL_pct	Phospholipids to Total Lipids in Very Large VLDL percentage	Phospholipids % (subclasses)
XS_VLDL_PL_pct	Phospholipids to Total Lipids in Very Small VLDL percentage	Phospholipids % (subclasses)
XXL_VLDL_PL_pct	Phospholipids to Total Lipids in Chylomicrons and Extremely Large VLDL percentage	Phospholipids % (subclasses)
HDL_L	Total Lipids in HDL	Total lipids (major classes)
LDL_L	Total Lipids in LDL	Total lipids (major classes)
Total_L	Total Lipids in Lipoprotein Particles	Total lipids (major classes)
VLDL_L	Total Lipids in VLDL	Total lipids (major classes)
IDL_L	Total Lipids in IDL	Total lipids (subclasses)
L_HDL_L	Total Lipids in Large HDL	Total lipids (subclasses)
L_LDL_L	Total Lipids in Large LDL	Total lipids (subclasses)
L_VLDL_L	Total Lipids in Large VLDL	Total lipids (subclasses)
M_HDL_L	Total Lipids in Medium HDL	Total lipids (subclasses)
M_LDL_L	Total Lipids in Medium LDL	Total lipids (subclasses)
M_VLDL_L	Total Lipids in Medium VLDL	Total lipids (subclasses)
S_HDL_L	Total Lipids in Small HDL	Total lipids (subclasses)
S_LDL_L	Total Lipids in Small LDL	Total lipids (subclasses)
S_VLDL_L	Total Lipids in Small VLDL	Total lipids (subclasses)
XL_HDL_L	Total Lipids in Very Large HDL	Total lipids (subclasses)
XL_VLDL_L	Total Lipids in Very Large VLDL	Total lipids (subclasses)
XS_VLDL_L	Total Lipids in Very Small VLDL	Total lipids (subclasses)
XXL_VLDL_L	Total Lipids in Chylomicrons and Extremely Large VLDL	Total lipids (subclasses)
HDL_TG	Triglycerides in HDL	Triglycerides (major classes)
LDL_TG	Triglycerides in LDL	Triglycerides (major classes)
Total_TG	Total Triglycerides	Triglycerides (major classes)
VLDL_TG	Triglycerides in VLDL	Triglycerides (major classes)
IDL_TG	Triglycerides in IDL	Triglycerides (subclasses)
L_HDL_TG	Triglycerides in Large HDL	Triglycerides (subclasses)
L_LDL_TG	Triglycerides in Large LDL	Triglycerides (subclasses)
L_VLDL_TG	Triglycerides in Large VLDL	Triglycerides (subclasses)
M_HDL_TG	Triglycerides in Medium HDL	Triglycerides (subclasses)
M_LDL_TG	Triglycerides in Medium LDL	Triglycerides (subclasses)
M_VLDL_TG	Triglycerides in Medium VLDL	Triglycerides (subclasses)
S_HDL_TG	Triglycerides in Small HDL	Triglycerides (subclasses)
S_LDL_TG	Triglycerides in Small LDL	Triglycerides (subclasses)
S_VLDL_TG	Triglycerides in Small VLDL	Triglycerides (subclasses)
XL_HDL_TG	Triglycerides in Very Large HDL	Triglycerides (subclasses)
XL_VLDL_TG	Triglycerides in Very Large VLDL	Triglycerides (subclasses)
XS_VLDL_TG	Triglycerides in Very Small VLDL	Triglycerides (subclasses)
XXL_VLDL_TG	Triglycerides in Chylomicrons and Extremely Large VLDL	Triglycerides (subclasses)
IDL_TG_pct	Triglycerides to Total Lipids in IDL percentage	Triglycerides % (subclasses)
L_HDL_TG_pct	Triglycerides to Total Lipids in Large HDL percentage	Triglycerides % (subclasses)
L_LDL_TG_pct	Triglycerides to Total Lipids in Large LDL percentage	Triglycerides % (subclasses)
L_VLDL_TG_pct	Triglycerides to Total Lipids in Large VLDL percentage	Triglycerides % (subclasses)
M_HDL_TG_pct	Triglycerides to Total Lipids in Medium HDL percentage	Triglycerides % (subclasses)
M_LDL_TG_pct	Triglycerides to Total Lipids in Medium LDL percentage	Triglycerides % (subclasses)
M_VLDL_TG_pct	Triglycerides to Total Lipids in Medium VLDL percentage	Triglycerides % (subclasses)
S_HDL_TG_pct	Triglycerides to Total Lipids in Small HDL percentage	Triglycerides % (subclasses)
S_LDL_TG_pct	Triglycerides to Total Lipids in Small LDL percentage	Triglycerides % (subclasses)
S_VLDL_TG_pct	Triglycerides to Total Lipids in Small VLDL percentage	Triglycerides % (subclasses)
XL_HDL_TG_pct	Triglycerides to Total Lipids in Very Large HDL percentage	Triglycerides % (subclasses)
XL_VLDL_TG_pct	Triglycerides to Total Lipids in Very Large VLDL percentage	Triglycerides % (subclasses)
XS_VLDL_TG_pct	Triglycerides to Total Lipids in Very Small VLDL percentage	Triglycerides % (subclasses)
XXL_VLDL_TG_pct	Triglycerides to Total Lipids in Chylomicrons and Extremely Large VLDL percentage	Triglycerides % (subclasses)

## Sheet: 1c
Supplementary File 1c. Principal component analysis of the NMR metabolites data.
Number of PC	Eigenvalue	Variance (percentage)	Cumulative Variance (percentage)
Dim.1	85.9548	34.829	34.829
Dim.2	68.2871	27.67	62.4989
Dim.3	28.5021	11.5491	74.048
Dim.4	13.0017	5.26829	79.3163
Dim.5	7.67812	3.11118	82.4275
Dim.6	5.47635	2.21902	84.6465
Dim.7	4.46321	1.80849	86.455
Dim.8	3.86249	1.56508	88.0201
Dim.9	3.38756	1.37264	89.3927
Dim.10	3.11459	1.26204	90.6548
Dim.11	2.0652	0.836821	91.4916
Dim.12	1.7006	0.689083	92.1807
Dim.13	1.49256	0.604788	92.7854
Dim.14	1.27124	0.515106	93.3005
Dim.15	1.14965	0.465837	93.7664
Dim.16	1.05909	0.429145	94.1955
Dim.17	0.93526	0.378968	94.5745
Dim.18	0.857145	0.347316	94.9218
Dim.19	0.792617	0.321169	95.243
Dim.20	0.755265	0.306034	95.549
Dim.21	0.724724	0.293659	95.8427
Dim.22	0.672173	0.272365	96.115
Dim.23	0.639177	0.258995	96.374
Dim.24	0.596158	0.241564	96.6156
Dim.25	0.557	0.225697	96.8413
Dim.26	0.541234	0.219308	97.0606
Dim.27	0.518043	0.209911	97.2705
Dim.28	0.483143	0.19577	97.4663
Dim.29	0.445755	0.18062	97.6469
Dim.30	0.420352	0.170327	97.8172
Dim.31	0.36752	0.148919	97.9662
Dim.32	0.359509	0.145673	98.1118
Dim.33	0.32504	0.131706	98.2435
Dim.34	0.319973	0.129653	98.3732
Dim.35	0.281082	0.113895	98.4871
Dim.36	0.255061	0.103351	98.5904
Dim.37	0.246657	0.0999454	98.6904
Dim.38	0.229624	0.0930438	98.7834
Dim.39	0.205693	0.083347	98.8668
Dim.40	0.182031	0.073759	98.9405
Dim.41	0.166746	0.0675655	99.0081
Dim.42	0.163705	0.0663334	99.0744
Dim.43	0.147056	0.0595871	99.134
Dim.44	0.136501	0.0553102	99.1893
Dim.45	0.130338	0.0528133	99.2421
Dim.46	0.127646	0.0517222	99.2939
Dim.47	0.112542	0.0456021	99.3395
Dim.48	0.107274	0.0434676	99.3829
Dim.49	0.0970034	0.0393059	99.4222
Dim.50	0.0871735	0.0353228	99.4576
Dim.51	0.0804917	0.0326153	99.4902
Dim.52	0.0739817	0.0299774	99.5201
Dim.53	0.070089	0.0284001	99.5485
Dim.54	0.0666577	0.0270098	99.5756
Dim.55	0.0652168	0.0264259	99.602
Dim.56	0.0612939	0.0248363	99.6268
Dim.57	0.0514595	0.0208514	99.6477
Dim.58	0.048088	0.0194853	99.6672
Dim.59	0.0455629	0.0184621	99.6856
Dim.60	0.0427928	0.0173397	99.703
Dim.61	0.0414328	0.0167886	99.7197
Dim.62	0.037577	0.0152262	99.735
Dim.63	0.036295	0.0147068	99.7497
Dim.64	0.0340167	0.0137836	99.7635
Dim.65	0.0325462	0.0131877	99.7767
Dim.66	0.0299999	0.012156	99.7888
Dim.67	0.0277082	0.0112274	99.8
Dim.68	0.0269907	0.0109367	99.811
Dim.69	0.0226814	0.00919051	99.8202
Dim.70	0.0215724	0.00874114	99.8289
Dim.71	0.0196893	0.00797813	99.8369
Dim.72	0.0191822	0.00777264	99.8447
Dim.73	0.0186334	0.00755028	99.8522
Dim.74	0.0173607	0.00703458	99.8592
Dim.75	0.0161941	0.00656188	99.8658
Dim.76	0.0146152	0.00592209	99.8717
Dim.77	0.0142088	0.0057574	99.8775
Dim.78	0.0133146	0.00539509	99.8829
Dim.79	0.0130351	0.00528181	99.8882
Dim.80	0.0124831	0.00505816	99.8932
Dim.81	0.0117951	0.00477939	99.898
Dim.82	0.0110619	0.0044823	99.9025
Dim.83	0.0106771	0.00432635	99.9068
Dim.84	0.0102499	0.00415328	99.911
Dim.85	0.00993285	0.0040248	99.915
Dim.86	0.00977413	0.00396049	99.9189
Dim.87	0.00940123	0.00380939	99.9228
Dim.88	0.00880435	0.00356753	99.9263
Dim.89	0.00841659	0.00341041	99.9297
Dim.90	0.00772957	0.00313203	99.9329
Dim.91	0.00751928	0.00304682	99.9359
Dim.92	0.00716955	0.00290511	99.9388
Dim.93	0.00662452	0.00268426	99.9415
Dim.94	0.00649363	0.00263123	99.9441
Dim.95	0.00595864	0.00241444	99.9465
Dim.96	0.00561944	0.002277	99.9488
Dim.97	0.00533014	0.00215978	99.951
Dim.98	0.00518649	0.00210157	99.9531
Dim.99	0.00511687	0.00207336	99.9552
Dim.100	0.00465986	0.00188818	99.957
Dim.101	0.00444469	0.00180099	99.9588
Dim.102	0.0042572	0.00172502	99.9606
Dim.103	0.00409665	0.00165997	99.9622
Dim.104	0.00388654	0.00157483	99.9638
Dim.105	0.00370983	0.00150322	99.9653
Dim.106	0.0035279	0.00142951	99.9667
Dim.107	0.0033896	0.00137347	99.9681
Dim.108	0.0032456	0.00131512	99.9694
Dim.109	0.00317746	0.00128751	99.9707
Dim.110	0.00304757	0.00123488	99.9719
Dim.111	0.00282094	0.00114305	99.9731
Dim.112	0.00267093	0.00108226	99.9742
Dim.113	0.0025519	0.00103403	99.9752
Dim.114	0.00250202	0.00101382	99.9762
Dim.115	0.00242515	0.000982673	99.9772
Dim.116	0.00222168	0.000900227	99.9781
Dim.117	0.00209675	0.000849605	99.979
Dim.118	0.0020473	0.000829566	99.9798
Dim.119	0.00201272	0.000815556	99.9806
Dim.120	0.00198051	0.000802504	99.9814
Dim.121	0.00183942	0.000745334	99.9821
Dim.122	0.00168848	0.000684174	99.9828
Dim.123	0.00162094	0.000656807	99.9835
Dim.124	0.00158494	0.00064222	99.9841
Dim.125	0.00154379	0.000625544	99.9848
Dim.126	0.00144929	0.000587254	99.9853
Dim.127	0.00140772	0.000570409	99.9859
Dim.128	0.00140661	0.000569959	99.9865
Dim.129	0.00127838	0.000518001	99.987
Dim.130	0.0012647	0.000512456	99.9875
Dim.131	0.00125258	0.000507548	99.988
Dim.132	0.00119229	0.000483118	99.9885
Dim.133	0.00113553	0.000460117	99.989
Dim.134	0.00108131	0.000438146	99.9894
Dim.135	0.0010355	0.000419584	99.9898
Dim.136	0.00100648	0.000407826	99.9902
Dim.137	0.000964446	0.000390794	99.9906
Dim.138	0.00091926	0.000372485	99.991
Dim.139	0.000869042	0.000352136	99.9913
Dim.140	0.000826476	0.000334889	99.9917
Dim.141	0.000804026	0.000325792	99.992
Dim.142	0.000773265	0.000313328	99.9923
Dim.143	0.000738371	0.000299189	99.9926
Dim.144	0.000731853	0.000296547	99.9929
Dim.145	0.000696639	0.000282279	99.9932
Dim.146	0.000662904	0.000268609	99.9935
Dim.147	0.000653035	0.00026461	99.9937
Dim.148	0.000642865	0.00026049	99.994
Dim.149	0.000610392	0.000247331	99.9942
Dim.150	0.000603909	0.000244705	99.9945
Dim.151	0.000557174	0.000225768	99.9947
Dim.152	0.000542224	0.00021971	99.9949
Dim.153	0.000501875	0.00020336	99.9951
Dim.154	0.000493138	0.00019982	99.9953
Dim.155	0.000472213	0.000191341	99.9955
Dim.156	0.000441758	0.000179001	99.9957
Dim.157	0.000438171	0.000177547	99.9959
Dim.158	0.000411625	0.000166791	99.996
Dim.159	0.000395168	0.000160122	99.9962
Dim.160	0.000386874	0.000156762	99.9964
Dim.161	0.000380105	0.000154019	99.9965
Dim.162	0.000369324	0.00014965	99.9967
Dim.163	0.00035301	0.00014304	99.9968
Dim.164	0.000339137	0.000137419	99.9969
Dim.165	0.000335507	0.000135948	99.9971
Dim.166	0.000321164	0.000130136	99.9972
Dim.167	0.000299936	0.000121534	99.9973
Dim.168	0.000296604	0.000120184	99.9975
Dim.169	0.000289808	0.00011743	99.9976
Dim.170	0.000279628	0.000113305	99.9977
Dim.171	0.000265397	0.000107539	99.9978
Dim.172	0.000254704	0.000103206	99.9979
Dim.173	0.000248089	0.000100526	99.998
Dim.174	0.000244478	9.90626e-05	99.9981
Dim.175	0.000237359	9.61782e-05	99.9982
Dim.176	0.00021831	8.84592e-05	99.9983
Dim.177	0.000209836	8.50259e-05	99.9984
Dim.178	0.000201538	8.16632e-05	99.9984
Dim.179	0.0001912	7.74744e-05	99.9985
Dim.180	0.000181846	7.36839e-05	99.9986
Dim.181	0.000179031	7.25437e-05	99.9987
Dim.182	0.00016968	6.87546e-05	99.9987
Dim.183	0.000159598	6.46693e-05	99.9988
Dim.184	0.000153667	6.2266e-05	99.9989
Dim.185	0.000150314	6.09074e-05	99.9989
Dim.186	0.000141071	5.71619e-05	99.999
Dim.187	0.000136738	5.54063e-05	99.999
Dim.188	0.000129262	5.2377e-05	99.9991
Dim.189	0.000127706	5.17464e-05	99.9991
Dim.190	0.000113835	4.61262e-05	99.9992
Dim.191	0.000111153	4.50394e-05	99.9992
Dim.192	0.000109575	4.43999e-05	99.9993
Dim.193	0.000103252	4.1838e-05	99.9993
Dim.194	9.44772e-05	3.82822e-05	99.9994
Dim.195	9.22434e-05	3.73771e-05	99.9994
Dim.196	8.79869e-05	3.56523e-05	99.9994
Dim.197	8.55682e-05	3.46723e-05	99.9995
Dim.198	7.72126e-05	3.12866e-05	99.9995
Dim.199	7.39188e-05	2.99519e-05	99.9995
Dim.200	7.05896e-05	2.86029e-05	99.9996
Dim.201	6.63683e-05	2.68925e-05	99.9996
Dim.202	6.31681e-05	2.55958e-05	99.9996
Dim.203	6.14712e-05	2.49082e-05	99.9996
Dim.204	5.78819e-05	2.34538e-05	99.9997
Dim.205	5.62232e-05	2.27817e-05	99.9997
Dim.206	4.99621e-05	2.02447e-05	99.9997
Dim.207	4.77507e-05	1.93486e-05	99.9997
Dim.208	4.61727e-05	1.87092e-05	99.9997
Dim.209	4.33169e-05	1.7552e-05	99.9998
Dim.210	3.93602e-05	1.59488e-05	99.9998
Dim.211	3.89409e-05	1.57789e-05	99.9998
Dim.212	3.72994e-05	1.51138e-05	99.9998
Dim.213	3.69482e-05	1.49714e-05	99.9998
Dim.214	3.30034e-05	1.3373e-05	99.9998
Dim.215	3.10014e-05	1.25618e-05	99.9998
Dim.216	2.80519e-05	1.13666e-05	99.9999
Dim.217	2.65174e-05	1.07449e-05	99.9999
Dim.218	2.38571e-05	9.66692e-06	99.9999
Dim.219	2.26219e-05	9.16639e-06	99.9999
Dim.220	2.08352e-05	8.44243e-06	99.9999
Dim.221	2.04259e-05	8.27659e-06	99.9999
Dim.222	1.89971e-05	7.69764e-06	99.9999
Dim.223	1.86839e-05	7.57075e-06	99.9999
Dim.224	1.76841e-05	7.16561e-06	99.9999
Dim.225	1.59994e-05	6.48296e-06	99.9999
Dim.226	1.53831e-05	6.23323e-06	99.9999
Dim.227	1.35081e-05	5.47349e-06	99.9999
Dim.228	1.28303e-05	5.19885e-06	99.9999
Dim.229	1.21147e-05	4.90888e-06	100
Dim.230	1.15337e-05	4.67347e-06	100
Dim.231	1.09979e-05	4.45635e-06	100
Dim.232	9.83218e-06	3.98401e-06	100
Dim.233	8.33978e-06	3.37928e-06	100
Dim.234	7.81958e-06	3.1685e-06	100
Dim.235	7.26234e-06	2.94271e-06	100
Dim.236	7.14369e-06	2.89463e-06	100
Dim.237	6.19562e-06	2.51047e-06	100
Dim.238	5.42405e-06	2.19783e-06	100
Dim.239	4.91637e-06	1.99212e-06	100
Dim.240	4.716e-06	1.91093e-06	100
Dim.241	4.61217e-06	1.86886e-06	100
Dim.242	4.32001e-06	1.75047e-06	100
Dim.243	3.97393e-06	1.61024e-06	100
Dim.244	3.48286e-06	1.41126e-06	100
Dim.245	3.38042e-06	1.36975e-06	100
Dim.246	2.22846e-06	9.02972e-07	100
Dim.247	2.18624e-06	8.85865e-07	100
Dim.248	2.04934e-06	8.30392e-07	100
Dim.249	1.96273e-06	7.95298e-07	100

## Sheet: 1d
Supplementary File 1d: Associations with the body mass index polygenic risk score
FDR was calculated based on all 125 PGS and 249 metabolic traits (n=31,125).
Metabolite	Description	Beta	SE	P	FDR	Subcategory
Acetate	Acetate	-0.0255573	0.00343672	1.04336e-13	2.85114e-12	Miscellaneous
Acetoacetate	Acetoacetate	0.0171209	0.00337844	4.03538e-07	6.67381e-06	Ketone bodies
Acetone	Acetone	-0.00500887	0.00337545	0.137836	0.351968	Miscellaneous
Ala	Alanine	0.00406601	0.00334215	0.223765	0.471992	Amino acids
Albumin	Albumin	-0.0442754	0.00340493	1.27667e-38	1.11306e-36	Miscellaneous
ApoA1	Apolipoprotein A1	-0.0538325	0.00312918	3.24916e-66	8.4275e-64	Apolipoproteins
ApoB	Apolipoprotein B	-0.00929625	0.00342161	0.00659045	0.0400875	Apolipoproteins
ApoB_by_ApoA1	Apolipoprotein B to Apolipoprotein A1 ratio	0.0227737	0.00338474	1.72709e-11	4.12237e-10	Apolipoproteins
bOHbutyrate	3-Hydroxybutyrate	0.00446645	0.00337189	0.185304	0.422441	Ketone bodies
Cholines	Total Cholines	-0.0419371	0.00320835	5.24876e-39	4.61491e-37	Phospholipids
Citrate	Citrate	-0.0115967	0.00334387	0.000524505	0.0048587	Glycolysis related
Clinical_LDL_C	Clinical LDL Cholesterol	-0.0227009	0.00339974	2.44966e-11	5.82919e-10	Cholesterol (major classes)
Creatinine	Creatinine	0.0220731	0.00291359	3.60382e-14	1.01053e-12	Miscellaneous
DHA	Docosahexaenoic Acid	-0.0413625	0.00325138	4.85635e-37	3.97773e-35	Fatty acids
DHA_pct	Docosahexaenoic Acid to Total Fatty Acids percentage	-0.0422347	0.00331082	3.10336e-37	2.56894e-35	Fatty acids (%)
Gln	Glutamine	-0.0335122	0.00341638	1.05629e-22	4.57896e-21	Amino acids
Glucose	Glucose	0.0174898	0.00338199	2.32824e-07	3.95128e-06	Glycolysis related
Gly	Glycine	-0.029463	0.00321662	5.31962e-20	2.01919e-18	Amino acids
GlycA	Glycoprotein Acetyls	0.0483447	0.00339675	6.49794e-46	7.83909e-44	Inflammation markers
HDL_C	HDL Cholesterol	-0.0632262	0.00308717	5.45976e-93	4.85529e-90	Cholesterol (major classes)
HDL_CE	Cholesteryl Esters in HDL	-0.0631174	0.00310016	6.39937e-92	5.38326e-89	Cholesteryl esters (major classes)
HDL_FC	Free Cholesterol in HDL	-0.060077	0.00305368	5.66978e-86	3.32966e-83	Free cholesterol (major classes)
HDL_L	Total Lipids in HDL	-0.0559003	0.00309658	1.04183e-72	3.52466e-70	Total lipids (major classes)
HDL_P	Concentration of HDL Particles	-0.0503619	0.00320492	1.45779e-55	2.66904e-53	Particle concentrations (major classes)
HDL_PL	Phospholipids in HDL	-0.050299	0.00310149	4.65285e-59	9.65466e-57	Phospholipids (major classes)
HDL_size	Average Diameter for HDL Particles	-0.0580692	0.00305875	3.35361e-80	1.41056e-77	Partical size
HDL_TG	Triglycerides in HDL	0.0105684	0.00335848	0.00165139	0.0128753	Triglycerides (major classes)
His	Histidine	-0.0146844	0.00340295	1.59632e-05	0.000208587	Amino acids
IDL_C	Cholesterol in IDL	-0.0335115	0.00330916	4.33368e-24	1.98947e-22	Cholesterol (subclasses)
IDL_C_pct	Cholesterol to Total Lipids in IDL percentage	-0.0394443	0.00334457	4.46844e-32	3.05001e-30	Cholesterol % (subclasses)
IDL_CE	Cholesteryl Esters in IDL	-0.0336986	0.00330562	2.17167e-24	1.01797e-22	Cholesteryl esters (subclasses)
IDL_CE_pct	Cholesteryl Esters to Total Lipids in IDL percentage	-0.037793	0.00334461	1.38319e-29	8.42501e-28	Cholesteryl esters % (subclasses)
IDL_FC	Free Cholesterol in IDL	-0.0323905	0.00331663	1.61821e-22	6.94714e-21	Free cholesterol (subclasses)
IDL_FC_pct	Free Cholesterol to Total Lipids in IDL percentage	-0.0233821	0.00340105	6.24271e-12	1.52635e-10	Free cholesterol % (subclasses)
IDL_L	Total Lipids in IDL	-0.0307927	0.00331545	1.61344e-20	6.32472e-19	Total lipids (subclasses)
IDL_P	Concentration of IDL Particles	-0.0134577	0.00338286	6.94956e-05	0.000798764	Particle concentrations (subclasses)
IDL_PL	Phospholipids in IDL	-0.0301113	0.00330907	9.25417e-20	3.47032e-18	Phospholipids (subclasses)
IDL_PL_pct	Phospholipids to Total Lipids in IDL percentage	0.0151168	0.00344008	1.11257e-05	0.000149326	Phospholipids % (subclasses)
IDL_TG	Triglycerides in IDL	0.0176909	0.00335218	1.31325e-07	2.29377e-06	Triglycerides (subclasses)
IDL_TG_pct	Triglycerides to Total Lipids in IDL percentage	0.0447116	0.00330346	1.07824e-41	1.07221e-39	Triglycerides % (subclasses)
Ile	Isoleucine	0.0270255	0.0033349	5.39547e-16	1.65779e-14	Amino acids
L_HDL_C	Cholesterol in Large HDL	-0.064768	0.00305818	2.72299e-99	3.39013e-96	Cholesterol (subclasses)
L_HDL_C_pct	Cholesterol to Total Lipids in Large HDL percentage	-0.0583618	0.00324985	5.62742e-72	1.88337e-69	Cholesterol % (subclasses)
L_HDL_CE	Cholesteryl Esters in Large HDL	-0.0653884	0.00306628	1.22363e-100	1.65589e-97	Cholesteryl esters (subclasses)
L_HDL_CE_pct	Cholesteryl Esters to Total Lipids in Large HDL percentage	-0.0582881	0.00327763	1.27447e-70	4.04775e-68	Cholesteryl esters % (subclasses)
L_HDL_FC	Free Cholesterol in Large HDL	-0.061298	0.0030354	1.7914e-90	1.35993e-87	Free cholesterol (subclasses)
L_HDL_FC_pct	Free Cholesterol to Total Lipids in Large HDL percentage	-0.0378681	0.00320664	3.70571e-32	2.54614e-30	Free cholesterol % (subclasses)
L_HDL_L	Total Lipids in Large HDL	-0.0616533	0.00304642	7.4659e-91	5.8094e-88	Total lipids (subclasses)
L_HDL_P	Concentration of Large HDL Particles	-0.0653477	0.00303523	1.54365e-102	2.40231e-99	Particle concentrations (subclasses)
L_HDL_PL	Phospholipids in Large HDL	-0.0581601	0.00303973	1.97956e-81	8.80195e-79	Phospholipids (subclasses)
L_HDL_PL_pct	Phospholipids to Total Lipids in Large HDL percentage	0.0625111	0.00333	1.84803e-78	7.5684e-76	Phospholipids % (subclasses)
L_HDL_TG	Triglycerides in Large HDL	-0.0266458	0.00324715	2.32057e-16	7.25908e-15	Triglycerides (subclasses)
L_HDL_TG_pct	Triglycerides to Total Lipids in Large HDL percentage	0.0402779	0.00324305	2.19269e-35	1.6977e-33	Triglycerides % (subclasses)
L_LDL_C	Cholesterol in Large LDL	-0.0293434	0.00338735	4.68921e-18	1.61095e-16	Cholesterol (subclasses)
L_LDL_C_pct	Cholesterol to Total Lipids in Large LDL percentage	-0.0566679	0.00332058	3.44691e-65	8.38164e-63	Cholesterol % (subclasses)
L_LDL_CE	Cholesteryl Esters in Large LDL	-0.0271226	0.00339298	1.32551e-15	3.95936e-14	Cholesteryl esters (subclasses)
L_LDL_CE_pct	Cholesteryl Esters to Total Lipids in Large LDL percentage	-0.0288171	0.00343078	4.5497e-17	1.48282e-15	Cholesteryl esters % (subclasses)
L_LDL_FC	Free Cholesterol in Large LDL	-0.0347434	0.00336105	4.95753e-25	2.41476e-23	Free cholesterol (subclasses)
L_LDL_FC_pct	Free Cholesterol to Total Lipids in Large LDL percentage	-0.0463322	0.00328643	4.39509e-45	5.06656e-43	Free cholesterol % (subclasses)
L_LDL_L	Total Lipids in Large LDL	-0.0265137	0.00339713	6.03151e-15	1.74501e-13	Total lipids (subclasses)
L_LDL_P	Concentration of Large LDL Particles	-0.0135848	0.00341603	6.99131e-05	0.000802673	Particle concentrations (subclasses)
L_LDL_PL	Phospholipids in Large LDL	-0.0235044	0.00339912	4.71698e-12	1.15877e-10	Phospholipids (subclasses)
L_LDL_PL_pct	Phospholipids to Total Lipids in Large LDL percentage	0.0223849	0.00342285	6.19345e-11	1.43859e-09	Phospholipids % (subclasses)
L_LDL_TG	Triglycerides in Large LDL	0.0178918	0.0033633	1.04192e-07	1.84155e-06	Triglycerides (subclasses)
L_LDL_TG_pct	Triglycerides to Total Lipids in Large LDL percentage	0.0447925	0.00333215	3.75726e-41	3.61843e-39	Triglycerides % (subclasses)
L_VLDL_C	Cholesterol in Large VLDL	0.0260355	0.00335431	8.46579e-15	2.43303e-13	Cholesterol (subclasses)
L_VLDL_C_pct	Cholesterol to Total Lipids in Large VLDL percentage	-0.0202486	0.00334169	1.3722e-09	2.87607e-08	Cholesterol % (subclasses)
L_VLDL_CE	Cholesteryl Esters in Large VLDL	0.019085	0.00337997	1.64259e-08	3.15202e-07	Cholesteryl esters (subclasses)
L_VLDL_CE_pct	Cholesteryl Esters to Total Lipids in Large VLDL percentage	-0.0325062	0.00327983	3.8417e-23	1.68888e-21	Cholesteryl esters % (subclasses)
L_VLDL_FC	Free Cholesterol in Large VLDL	0.032051	0.00332108	5.00679e-22	2.0974e-20	Free cholesterol (subclasses)
L_VLDL_FC_pct	Free Cholesterol to Total Lipids in Large VLDL percentage	0.0211978	0.00337716	3.47275e-10	7.64963e-09	Free cholesterol % (subclasses)
L_VLDL_L	Total Lipids in Large VLDL	0.0304379	0.00332048	4.98075e-20	1.89518e-18	Total lipids (subclasses)
L_VLDL_P	Concentration of Large VLDL Particles	0.0315084	0.00331597	2.11006e-21	8.60756e-20	Particle concentrations (subclasses)
L_VLDL_PL	Phospholipids in Large VLDL	0.0335046	0.00331598	5.47297e-24	2.50141e-22	Phospholipids (subclasses)
L_VLDL_PL_pct	Phospholipids to Total Lipids in Large VLDL percentage	0.0421081	0.00332471	9.95421e-37	8.13188e-35	Phospholipids % (subclasses)
L_VLDL_TG	Triglycerides in Large VLDL	0.0301267	0.00330453	7.90066e-20	2.9699e-18	Triglycerides (subclasses)
L_VLDL_TG_pct	Triglycerides to Total Lipids in Large VLDL percentage	-0.00242002	0.0034003	0.476648	0.706338	Triglycerides % (subclasses)
LA	Linoleic Acid	-0.0299655	0.00334944	3.74496e-19	1.36649e-17	Fatty acids
LA_pct	Linoleic Acid to Total Fatty Acids percentage	-0.05031	0.00329688	1.66476e-52	2.56513e-50	Fatty acids (%)
Lactate	Lactate	0.00050376	0.00340638	0.882432	0.9485	Glycolysis related
LDL_C	LDL Cholesterol	-0.022756	0.00341134	2.56173e-11	6.08192e-10	Cholesterol (major classes)
LDL_CE	Cholesteryl Esters in LDL	-0.0196641	0.00341803	8.79537e-09	1.72174e-07	Cholesteryl esters (major classes)
LDL_FC	Free Cholesterol in LDL	-0.0300801	0.00338761	6.84664e-19	2.46645e-17	Free cholesterol (major classes)
LDL_L	Total Lipids in LDL	-0.019883	0.00342074	6.17763e-09	1.22549e-07	Total lipids (major classes)
LDL_P	Concentration of LDL Particles	-0.0109508	0.00342804	0.0014014	0.0112188	Particle concentrations (major classes)
LDL_PL	Phospholipids in LDL	-0.0169376	0.00341884	7.27668e-07	1.16088e-05	Phospholipids (major classes)
LDL_size	Average Diameter for LDL Particles	-0.0246905	0.0033206	1.05107e-13	2.86969e-12	Partical size
LDL_TG	Triglycerides in LDL	0.0201574	0.00336373	2.07372e-09	4.28868e-08	Triglycerides (major classes)
Leu	Leucine	0.0270154	0.00325773	1.123e-16	3.58497e-15	Amino acids
M_HDL_C	Cholesterol in Medium HDL	-0.0530771	0.00315472	2.04493e-63	4.64588e-61	Cholesterol (subclasses)
M_HDL_C_pct	Cholesterol to Total Lipids in Medium HDL percentage	-0.0539294	0.0032773	9.54681e-61	2.04927e-58	Cholesterol % (subclasses)
M_HDL_CE	Cholesteryl Esters in Medium HDL	-0.0529253	0.00316646	1.30042e-62	2.91191e-60	Cholesteryl esters (subclasses)
M_HDL_CE_pct	Cholesteryl Esters to Total Lipids in Medium HDL percentage	-0.0454523	0.00331876	1.19939e-42	1.23613e-40	Cholesteryl esters % (subclasses)
M_HDL_FC	Free Cholesterol in Medium HDL	-0.0526467	0.00311471	5.492e-64	1.2569e-61	Free cholesterol (subclasses)
M_HDL_FC_pct	Free Cholesterol to Total Lipids in Medium HDL percentage	-0.0631335	0.0030648	4.73831e-94	4.46909e-91	Free cholesterol % (subclasses)
M_HDL_L	Total Lipids in Medium HDL	-0.0451966	0.00317828	7.73243e-46	9.29235e-44	Total lipids (subclasses)
M_HDL_P	Concentration of Medium HDL Particles	-0.0500964	0.00315148	8.15368e-57	1.57629e-54	Particle concentrations (subclasses)
M_HDL_PL	Phospholipids in Medium HDL	-0.038639	0.00319667	1.31462e-33	9.53792e-32	Phospholipids (subclasses)
M_HDL_PL_pct	Phospholipids to Total Lipids in Medium HDL percentage	0.0690461	0.00326391	4.56627e-99	5.46636e-96	Phospholipids % (subclasses)
M_HDL_TG	Triglycerides in Medium HDL	0.0123856	0.00335932	0.000227125	0.00232236	Triglycerides (subclasses)
M_HDL_TG_pct	Triglycerides to Total Lipids in Medium HDL percentage	0.0402452	0.00329847	3.2765e-34	2.42235e-32	Triglycerides % (subclasses)
M_LDL_C	Cholesterol in Medium LDL	-0.010321	0.00343213	0.00263773	0.0190397	Cholesterol (subclasses)
M_LDL_C_pct	Cholesterol to Total Lipids in Medium LDL percentage	-0.0397388	0.00342203	3.75512e-31	2.44004e-29	Cholesterol % (subclasses)
M_LDL_CE	Cholesteryl Esters in Medium LDL	-0.00605103	0.00342897	0.0776213	0.243275	Cholesteryl esters (subclasses)
M_LDL_CE_pct	Cholesteryl Esters to Total Lipids in Medium LDL percentage	0.00999704	0.00341924	0.00345923	0.0236999	Cholesteryl esters % (subclasses)
M_LDL_FC	Free Cholesterol in Medium LDL	-0.0219383	0.00341595	1.34943e-10	3.04134e-09	Free cholesterol (subclasses)
M_LDL_FC_pct	Free Cholesterol to Total Lipids in Medium LDL percentage	-0.0420063	0.00329028	2.72168e-37	2.26504e-35	Free cholesterol % (subclasses)
M_LDL_L	Total Lipids in Medium LDL	-0.00787073	0.00343415	0.021914	0.0993552	Total lipids (subclasses)
M_LDL_P	Concentration of Medium LDL Particles	-0.00811036	0.00342789	0.017984	0.0857859	Particle concentrations (subclasses)
M_LDL_PL	Phospholipids in Medium LDL	-0.00706265	0.0034287	0.0394149	0.152823	Phospholipids (subclasses)
M_LDL_PL_pct	Phospholipids to Total Lipids in Medium LDL percentage	0.00957358	0.00340948	0.00498728	0.0318942	Phospholipids % (subclasses)
M_LDL_TG	Triglycerides in Medium LDL	0.0218573	0.00335248	7.08266e-11	1.63416e-09	Triglycerides (subclasses)
M_LDL_TG_pct	Triglycerides to Total Lipids in Medium LDL percentage	0.0334935	0.00335331	1.76969e-23	7.88007e-22	Triglycerides % (subclasses)
M_VLDL_C	Cholesterol in Medium VLDL	-0.0153344	0.0034151	7.12555e-06	9.86578e-05	Cholesterol (subclasses)
M_VLDL_C_pct	Cholesterol to Total Lipids in Medium VLDL percentage	-0.0395252	0.00324116	3.54253e-34	2.61283e-32	Cholesterol % (subclasses)
M_VLDL_CE	Cholesteryl Esters in Medium VLDL	-0.0231435	0.00338842	8.53769e-12	2.07931e-10	Cholesteryl esters (subclasses)
M_VLDL_CE_pct	Cholesteryl Esters to Total Lipids in Medium VLDL percentage	-0.0408982	0.00323074	1.07652e-36	8.74846e-35	Cholesteryl esters % (subclasses)
M_VLDL_FC	Free Cholesterol in Medium VLDL	-0.00354224	0.00342029	0.300366	0.5554	Free cholesterol (subclasses)
M_VLDL_FC_pct	Free Cholesterol to Total Lipids in Medium VLDL percentage	-0.0347215	0.00327507	3.03744e-26	1.56265e-24	Free cholesterol % (subclasses)
M_VLDL_L	Total Lipids in Medium VLDL	0.0094039	0.00341231	0.00585478	0.0362575	Total lipids (subclasses)
M_VLDL_P	Concentration of Medium VLDL Particles	0.00458097	0.00341399	0.179656	0.414424	Particle concentrations (subclasses)
M_VLDL_PL	Phospholipids in Medium VLDL	0.0024329	0.00341676	0.476437	0.706215	Phospholipids (subclasses)
M_VLDL_PL_pct	Phospholipids to Total Lipids in Medium VLDL percentage	-0.0283816	0.00329866	7.83133e-18	2.66103e-16	Phospholipids % (subclasses)
M_VLDL_TG	Triglycerides in Medium VLDL	0.0235462	0.00333236	1.60785e-12	4.0786e-11	Triglycerides (subclasses)
M_VLDL_TG_pct	Triglycerides to Total Lipids in Medium VLDL percentage	0.0376248	0.00325028	5.76377e-31	3.70656e-29	Triglycerides % (subclasses)
MUFA	Monounsaturated Fatty Acids	0.0238339	0.00338885	2.03593e-12	5.11036e-11	Fatty acids
MUFA_pct	Monounsaturated Fatty Acids to Total Fatty Acids percentage	0.0562279	0.00331227	1.59544e-64	3.76197e-62	Fatty acids (%)
non_HDL_C	Total Cholesterol Minus HDL-C	-0.0186527	0.00342374	5.10694e-08	9.31186e-07	Cholesterol (major classes)
Omega_3	Omega-3 Fatty Acids	-0.0193064	0.0032934	4.58656e-09	9.18641e-08	Fatty acids
Omega_3_pct	Omega-3 Fatty Acids to Total Fatty Acids percentage	-0.023213	0.00330109	2.05256e-12	5.1438e-11	Fatty acids (%)
Omega_6	Omega-6 Fatty Acids	-0.0255845	0.00333692	1.77826e-14	5.07316e-13	Fatty acids
Omega_6_by_Omega_3	Omega-6 Fatty Acids to Omega-3 Fatty Acids ratio	0.0104649	0.00330425	0.00154028	0.0121278	Fatty acids (%)
Omega_6_pct	Omega-6 Fatty Acids to Total Fatty Acids percentage	-0.0402252	0.00329023	2.4251e-34	1.80577e-32	Fatty acids (%)
Phe	Phenylalanine	0.0233232	0.00339321	6.30764e-12	1.54101e-10	Amino acids
Phosphatidylc	Phosphatidylcholines	-0.0423919	0.00319777	4.52672e-40	4.18084e-38	Phospholipids
Phosphoglyc	Phosphoglycerides	-0.0358164	0.0032288	1.42311e-28	8.27931e-27	Phospholipids
PUFA	Polyunsaturated Fatty Acids	-0.0266814	0.00332744	1.08315e-15	3.26993e-14	Fatty acids
PUFA_by_MUFA	Polyunsaturated Fatty Acids to Monounsaturated Fatty Acids ratio	-0.0538674	0.00330218	9.91668e-60	2.0997e-57	Fatty acids (%)
PUFA_pct	Polyunsaturated Fatty Acids to Total Fatty Acids percentage	-0.0477479	0.00329385	1.46467e-47	1.9482e-45	Fatty acids (%)
Pyruvate	Pyruvate	0.00473849	0.00341086	0.164765	0.393755	Glycolysis related
Remnant_C	Remnant Cholesterol (Non-HDL, Non-LDL -Cholesterol)	-0.0133216	0.00341983	9.81125e-05	0.00109532	Cholesterol (major classes)
S_HDL_C	Cholesterol in Small HDL	-0.0207564	0.00341973	1.28775e-09	2.70271e-08	Cholesterol (subclasses)
S_HDL_C_pct	Cholesterol to Total Lipids in Small HDL percentage	-0.0294082	0.00336446	2.35575e-18	8.22004e-17	Cholesterol % (subclasses)
S_HDL_CE	Cholesteryl Esters in Small HDL	-0.0166426	0.00343009	1.22484e-06	1.90046e-05	Cholesteryl esters (subclasses)
S_HDL_CE_pct	Cholesteryl Esters to Total Lipids in Small HDL percentage	-0.0160085	0.00334064	1.65385e-06	2.51964e-05	Cholesteryl esters % (subclasses)
S_HDL_FC	Free Cholesterol in Small HDL	-0.0284452	0.0033499	2.07493e-17	6.91459e-16	Free cholesterol (subclasses)
S_HDL_FC_pct	Free Cholesterol to Total Lipids in Small HDL percentage	-0.0505346	0.00328229	2.0568e-53	3.35172e-51	Free cholesterol % (subclasses)
S_HDL_L	Total Lipids in Small HDL	-0.00928772	0.00342058	0.00662401	0.0402523	Total lipids (subclasses)
S_HDL_P	Concentration of Small HDL Particles	-0.0146203	0.00342734	1.99413e-05	0.000256476	Particle concentrations (subclasses)
S_HDL_PL	Phospholipids in Small HDL	-0.00945405	0.00339595	0.00537179	0.033825	Phospholipids (subclasses)
S_HDL_PL_pct	Phospholipids to Total Lipids in Small HDL percentage	-0.00168819	0.00330337	0.609317	0.797888	Phospholipids % (subclasses)
S_HDL_TG	Triglycerides in Small HDL	0.0347881	0.00332519	1.33821e-25	6.77264e-24	Triglycerides (subclasses)
S_HDL_TG_pct	Triglycerides to Total Lipids in Small HDL percentage	0.0440399	0.00327621	3.76665e-41	3.61843e-39	Triglycerides % (subclasses)
S_LDL_C	Cholesterol in Small LDL	-0.00978052	0.00342963	0.00434873	0.0285078	Cholesterol (subclasses)
S_LDL_C_pct	Cholesterol to Total Lipids in Small LDL percentage	-0.0301607	0.00341945	1.16243e-18	4.15393e-17	Cholesterol % (subclasses)
S_LDL_CE	Cholesteryl Esters in Small LDL	-0.00546276	0.00342898	0.111138	0.307757	Cholesteryl esters (subclasses)
S_LDL_CE_pct	Cholesteryl Esters to Total Lipids in Small LDL percentage	0.0030414	0.00342541	0.374601	0.625457	Cholesteryl esters % (subclasses)
S_LDL_FC	Free Cholesterol in Small LDL	-0.0198098	0.00341561	6.66432e-09	1.31867e-07	Free cholesterol (subclasses)
S_LDL_FC_pct	Free Cholesterol to Total Lipids in Small LDL percentage	-0.0330957	0.00331565	1.88963e-23	8.39013e-22	Free cholesterol % (subclasses)
S_LDL_L	Total Lipids in Small LDL	-0.00662651	0.00342823	0.0532492	0.188531	Total lipids (subclasses)
S_LDL_P	Concentration of Small LDL Particles	-0.00426474	0.00342267	0.212758	0.458348	Particle concentrations (subclasses)
S_LDL_PL	Phospholipids in Small LDL	-0.00831879	0.0034145	0.01484	0.0742714	Phospholipids (subclasses)
S_LDL_PL_pct	Phospholipids to Total Lipids in Small LDL percentage	-0.00288635	0.00342424	0.399276	0.646607	Phospholipids % (subclasses)
S_LDL_TG	Triglycerides in Small LDL	0.0251009	0.00332797	4.65966e-14	1.29488e-12	Triglycerides (subclasses)
S_LDL_TG_pct	Triglycerides to Total Lipids in Small LDL percentage	0.034351	0.00331277	3.54344e-25	1.7562e-23	Triglycerides % (subclasses)
S_VLDL_C	Cholesterol in Small VLDL	0.00443762	0.00342548	0.19516	0.435543	Cholesterol (subclasses)
S_VLDL_C_pct	Cholesterol to Total Lipids in Small VLDL percentage	-0.0224805	0.00333447	1.57378e-11	3.768e-10	Cholesterol % (subclasses)
S_VLDL_CE	Cholesteryl Esters in Small VLDL	0.00887621	0.00341929	0.00943532	0.0528191	Cholesteryl esters (subclasses)
S_VLDL_CE_pct	Cholesteryl Esters to Total Lipids in Small VLDL percentage	-0.00945696	0.00338619	0.00522657	0.0331048	Cholesteryl esters % (subclasses)
S_VLDL_FC	Free Cholesterol in Small VLDL	-0.00422933	0.00342509	0.216905	0.463393	Free cholesterol (subclasses)
S_VLDL_FC_pct	Free Cholesterol to Total Lipids in Small VLDL percentage	-0.0364964	0.00326969	6.55198e-29	3.88439e-27	Free cholesterol % (subclasses)
S_VLDL_L	Total Lipids in Small VLDL	0.0146304	0.00339744	1.66182e-05	0.000216148	Total lipids (subclasses)
S_VLDL_P	Concentration of Small VLDL Particles	0.0164084	0.00337901	1.2e-06	1.86284e-05	Particle concentrations (subclasses)
S_VLDL_PL	Phospholipids in Small VLDL	0.00447278	0.00341765	0.19063	0.429697	Phospholipids (subclasses)
S_VLDL_PL_pct	Phospholipids to Total Lipids in Small VLDL percentage	-0.0339627	0.00327334	3.31726e-25	1.64673e-23	Phospholipids % (subclasses)
S_VLDL_TG	Triglycerides in Small VLDL	0.0245034	0.0033201	1.59344e-13	4.29774e-12	Triglycerides (subclasses)
S_VLDL_TG_pct	Triglycerides to Total Lipids in Small VLDL percentage	0.0262807	0.00331364	2.19906e-15	6.49389e-14	Triglycerides % (subclasses)
SFA	Saturated Fatty Acids	0.00393956	0.00337587	0.243223	0.494662	Fatty acids
SFA_pct	Saturated Fatty Acids to Total Fatty Acids percentage	0.013467	0.00336351	6.23711e-05	0.000725177	Fatty acids (%)
Sphingomyelins	Sphingomyelins	-0.0429577	0.00319079	2.8476e-41	2.76974e-39	Phospholipids
TG_by_PG	Triglycerides to Phosphoglycerides ratio	0.0471735	0.00322639	2.36485e-48	3.20025e-46	Phospholipids
Total_BCAA	Total Concentration of Branched-Chain Amino Acids (Leucine + Isoleucine + Valine)	0.0335413	0.00328714	1.96994e-24	9.27601e-23	Amino acids
Total_C	Total Cholesterol	-0.0378172	0.00332961	7.13114e-30	4.39518e-28	Cholesterol (major classes)
Total_CE	Total Esterified Cholesterol	-0.0407021	0.00330654	8.62384e-35	6.46788e-33	Cholesteryl esters (major classes)
Total_FA	Total Fatty Acids	0.00102675	0.0033916	0.762095	0.8906	Fatty acids
Total_FC	Total Free Cholesterol	-0.0297998	0.00336423	8.31316e-19	2.98784e-17	Free cholesterol (major classes)
Total_L	Total Lipids in Lipoprotein Particles	-0.021423	0.00339289	2.73129e-10	6.04634e-09	Total lipids (major classes)
Total_P	Total Concentration of Lipoprotein Particles	-0.0495792	0.00322207	2.35529e-53	3.81815e-51	Particle concentrations (major classes)
Total_PL	Total Phospholipids in Lipoprotein Particles	-0.0349655	0.0032684	1.08167e-26	5.65833e-25	Phospholipids (major classes)
Total_TG	Total Triglycerides	0.0296958	0.00334341	6.70037e-19	2.41656e-17	Triglycerides (major classes)
Tyr	Tyrosine	0.0304311	0.0033697	1.73872e-19	6.45026e-18	Amino acids
Unsaturation	Degree of Unsaturation	-0.0442812	0.00324192	1.98026e-42	2.01423e-40	Fatty acids (%)
Val	Valine	0.0376367	0.00329059	2.85257e-30	1.77573e-28	Amino acids
VLDL_C	VLDL Cholesterol	0.00819501	0.00343277	0.0169754	0.0821325	Cholesterol (major classes)
VLDL_CE	Cholesteryl Esters in VLDL	0.00171665	0.00343437	0.617187	0.80279	Cholesteryl esters (major classes)
VLDL_FC	Free Cholesterol in VLDL	0.0167546	0.00341317	9.17997e-07	1.44745e-05	Free cholesterol (major classes)
VLDL_L	Total Lipids in VLDL	0.0246494	0.00338561	3.35138e-13	8.84746e-12	Total lipids (major classes)
VLDL_P	Concentration of VLDL Particles	0.0124346	0.0034167	0.000273488	0.00274946	Particle concentrations (major classes)
VLDL_PL	Phospholipids in VLDL	0.0210622	0.00340152	5.96786e-10	1.28993e-08	Phospholipids (major classes)
VLDL_size	Average Diameter for VLDL Particles	0.0397772	0.00321265	3.53323e-35	2.70866e-33	Partical size
VLDL_TG	Triglycerides in VLDL	0.0319302	0.00331754	6.45847e-22	2.69103e-20	Triglycerides (major classes)
XL_HDL_C	Cholesterol in Very Large HDL	-0.0602847	0.00312305	7.60739e-83	3.48206e-80	Cholesterol (subclasses)
XL_HDL_C_pct	Cholesterol to Total Lipids in Very Large HDL percentage	0.0213895	0.00324804	4.56496e-11	1.0683e-09	Cholesterol % (subclasses)
XL_HDL_CE	Cholesteryl Esters in Very Large HDL	-0.0625858	0.00310388	3.31695e-90	2.45809e-87	Cholesteryl esters (subclasses)
XL_HDL_CE_pct	Cholesteryl Esters to Total Lipids in Very Large HDL percentage	-0.0342015	0.00339273	6.92852e-24	3.13901e-22	Cholesteryl esters % (subclasses)
XL_HDL_FC	Free Cholesterol in Very Large HDL	-0.0482331	0.00320718	4.73661e-51	7.12208e-49	Free cholesterol (subclasses)
XL_HDL_FC_pct	Free Cholesterol to Total Lipids in Very Large HDL percentage	0.061546	0.00306564	1.93351e-89	1.33734e-86	Free cholesterol % (subclasses)
XL_HDL_L	Total Lipids in Very Large HDL	-0.057646	0.00311587	2.88107e-76	1.10708e-73	Total lipids (subclasses)
XL_HDL_P	Concentration of Very Large HDL Particles	-0.0607312	0.00310934	9.03188e-85	4.93188e-82	Particle concentrations (subclasses)
XL_HDL_PL	Phospholipids in Very Large HDL	-0.0545067	0.00310225	5.53515e-69	1.64078e-66	Phospholipids (subclasses)
XL_HDL_PL_pct	Phospholipids to Total Lipids in Very Large HDL percentage	-0.041674	0.00315979	1.1133e-39	1.00439e-37	Phospholipids % (subclasses)
XL_HDL_TG	Triglycerides in Very Large HDL	-0.011961	0.00333318	0.000332805	0.00328218	Triglycerides (subclasses)
XL_HDL_TG_pct	Triglycerides to Total Lipids in Very Large HDL percentage	0.0412367	0.00324078	4.68785e-37	3.84985e-35	Triglycerides % (subclasses)
XL_VLDL_C	Cholesterol in Very Large VLDL	0.0295419	0.00335271	1.25907e-18	4.47359e-17	Cholesterol (subclasses)
XL_VLDL_C_pct	Cholesterol to Total Lipids in Very Large VLDL percentage	-0.0356043	0.00326515	1.14618e-27	6.31413e-26	Cholesterol % (subclasses)
XL_VLDL_CE	Cholesteryl Esters in Very Large VLDL	0.0248241	0.00337313	1.86451e-13	5.00715e-12	Cholesteryl esters (subclasses)
XL_VLDL_CE_pct	Cholesteryl Esters to Total Lipids in Very Large VLDL percentage	-0.0361721	0.00326352	1.57352e-28	9.1033e-27	Cholesteryl esters % (subclasses)
XL_VLDL_FC	Free Cholesterol in Very Large VLDL	0.0334704	0.00332305	7.55988e-24	3.40031e-22	Free cholesterol (subclasses)
XL_VLDL_FC_pct	Free Cholesterol to Total Lipids in Very Large VLDL percentage	-0.027379	0.00330302	1.15765e-16	3.69178e-15	Free cholesterol % (subclasses)
XL_VLDL_L	Total Lipids in Very Large VLDL	0.0356988	0.00330963	4.15932e-27	2.2359e-25	Total lipids (subclasses)
XL_VLDL_P	Concentration of Very Large VLDL Particles	0.0360965	0.00330154	8.34425e-28	4.6295e-26	Particle concentrations (subclasses)
XL_VLDL_PL	Phospholipids in Very Large VLDL	0.0356012	0.00331136	6.08536e-27	3.24327e-25	Phospholipids (subclasses)
XL_VLDL_PL_pct	Phospholipids to Total Lipids in Very Large VLDL percentage	0.0126009	0.00339623	0.00020718	0.00214592	Phospholipids % (subclasses)
XL_VLDL_TG	Triglycerides in Very Large VLDL	0.0369053	0.00328425	2.8126e-29	1.6835e-27	Triglycerides (subclasses)
XL_VLDL_TG_pct	Triglycerides to Total Lipids in Very Large VLDL percentage	0.0278136	0.00330389	3.87393e-17	1.27056e-15	Triglycerides % (subclasses)
XS_VLDL_C	Cholesterol in Very Small VLDL	-0.0193783	0.00331879	5.27151e-09	1.04975e-07	Cholesterol (subclasses)
XS_VLDL_C_pct	Cholesterol to Total Lipids in Very Small VLDL percentage	-0.044779	0.00325038	3.92785e-43	4.08878e-41	Cholesterol % (subclasses)
XS_VLDL_CE	Cholesteryl Esters in Very Small VLDL	-0.0244051	0.00329881	1.39383e-13	3.77572e-12	Cholesteryl esters (subclasses)
XS_VLDL_CE_pct	Cholesteryl Esters to Total Lipids in Very Small VLDL percentage	-0.0477349	0.00323163	2.59107e-49	3.60032e-47	Cholesteryl esters % (subclasses)
XS_VLDL_FC	Free Cholesterol in Very Small VLDL	-0.00694919	0.00335069	0.0380864	0.149168	Free cholesterol (subclasses)
XS_VLDL_FC_pct	Free Cholesterol to Total Lipids in Very Small VLDL percentage	-0.0116031	0.00339512	0.000632121	0.00570945	Free cholesterol % (subclasses)
XS_VLDL_L	Total Lipids in Very Small VLDL	-0.00466983	0.00335438	0.163879	0.392363	Total lipids (subclasses)
XS_VLDL_P	Concentration of Very Small VLDL Particles	-0.00423053	0.00336922	0.209249	0.453544	Particle concentrations (subclasses)
XS_VLDL_PL	Phospholipids in Very Small VLDL	0.00177083	0.00335747	0.597896	0.789744	Phospholipids (subclasses)
XS_VLDL_PL_pct	Phospholipids to Total Lipids in Very Small VLDL percentage	0.0579614	0.00332046	4.09655e-68	1.1806e-65	Phospholipids % (subclasses)
XS_VLDL_TG	Triglycerides in Very Small VLDL	0.0227842	0.0033418	9.29606e-12	2.2587e-10	Triglycerides (subclasses)
XS_VLDL_TG_pct	Triglycerides to Total Lipids in Very Small VLDL percentage	0.0381214	0.00325766	1.31538e-31	8.74814e-30	Triglycerides % (subclasses)
XXL_VLDL_C	Cholesterol in Chylomicrons and Extremely Large VLDL	0.0352158	0.00331061	2.07772e-26	1.07782e-24	Cholesterol (subclasses)
XXL_VLDL_C_pct	Cholesterol to Total Lipids in Chylomicrons and Extremely Large VLDL percentage	-0.0279166	0.00335601	9.04617e-17	2.89673e-15	Cholesterol % (subclasses)
XXL_VLDL_CE	Cholesteryl Esters in Chylomicrons and Extremely Large VLDL	0.033971	0.00331507	1.25591e-24	5.97711e-23	Cholesteryl esters (subclasses)
XXL_VLDL_CE_pct	Cholesteryl Esters to Total Lipids in Chylomicrons and Extremely Large VLDL percentage	-0.0230034	0.00337269	9.1338e-12	2.22101e-10	Cholesteryl esters % (subclasses)
XXL_VLDL_FC	Free Cholesterol in Chylomicrons and Extremely Large VLDL	0.0360911	0.00330564	9.86268e-28	5.45251e-26	Free cholesterol (subclasses)
XXL_VLDL_FC_pct	Free Cholesterol to Total Lipids in Chylomicrons and Extremely Large VLDL percentage	-0.0292676	0.00333732	1.82198e-18	6.40057e-17	Free cholesterol % (subclasses)
XXL_VLDL_L	Total Lipids in Chylomicrons and Extremely Large VLDL	0.0372025	0.00331081	2.82451e-29	1.68738e-27	Total lipids (subclasses)
XXL_VLDL_P	Concentration of Chylomicrons and Extremely Large VLDL Particles	0.0380264	0.0032997	1.05034e-30	6.69914e-29	Particle concentrations (subclasses)
XXL_VLDL_PL	Phospholipids in Chylomicrons and Extremely Large VLDL	0.0386428	0.00329711	1.06231e-31	7.09535e-30	Phospholipids (subclasses)
XXL_VLDL_PL_pct	Phospholipids to Total Lipids in Chylomicrons and Extremely Large VLDL percentage	0.0145658	0.00335639	1.42826e-05	0.000188367	Phospholipids % (subclasses)
XXL_VLDL_TG	Triglycerides in Chylomicrons and Extremely Large VLDL	0.0373338	0.00331139	1.84396e-29	1.11878e-27	Triglycerides (subclasses)
XXL_VLDL_TG_pct	Triglycerides to Total Lipids in Chylomicrons and Extremely Large VLDL percentage	0.0174666	0.00337704	2.31945e-07	3.94066e-06	Triglycerides % (subclasses)

## Sheet: 1e
Supplementary File 1e: Mendelian randomization results with very low-density lipoprotein (VLDL) particle size as the exposure and complex traits as the outcome
exposure	outcome	method	nsnp	b	se	pval
Body mass index	Concentration of VLDL particles	Inverse variance weighted	79	0.0162613	0.0250851	0.516826
Body mass index	Concentration of VLDL particles	MR Egger	79	-0.0246503	0.0613206	0.688804
Body mass index	Concentration of VLDL particles	Weighted median	79	-0.0278286	0.0317198	0.38031
Body mass index	Average diameter for VLDL particles	Inverse variance weighted	79	0.115112	0.0321655	0.000345258
Body mass index	Average diameter for VLDL particles	MR Egger	79	0.0609452	0.0786261	0.440639
Body mass index	Average diameter for VLDL particles	Weighted median	79	0.107818	0.0294745	0.000254174
Coronary heart disease	Concentration of VLDL particles	Inverse variance weighted	41	0.0137949	0.0517651	0.789862
Coronary heart disease	Concentration of VLDL particles	MR Egger	41	-0.134891	0.117942	0.259716
Coronary heart disease	Concentration of VLDL particles	Weighted median	41	-0.0461737	0.0157013	0.00327415
Coronary heart disease	Average diameter for VLDL particles	Inverse variance weighted	41	-0.131713	0.0437928	0.00263285
Coronary heart disease	Average diameter for VLDL particles	MR Egger	41	-0.423763	0.0880611	2.26153e-05
Coronary heart disease	Average diameter for VLDL particles	Weighted median	41	-0.0266216	0.0154465	0.0848033
Concentration of VLDL particles	Body mass index	Inverse variance weighted	40	-0.0413368	0.0223943	0.0649117
Concentration of VLDL particles	Body mass index	MR Egger	40	0.0129488	0.0404796	0.750808
Concentration of VLDL particles	Body mass index	Weighted median	40	-0.00909449	0.0192862	0.637245
Concentration of VLDL particles	Coronary heart disease	Inverse variance weighted	62	0.361625	0.0703942	2.78944e-07
Concentration of VLDL particles	Coronary heart disease	MR Egger	62	0.247034	0.128144	0.0586184
Concentration of VLDL particles	Coronary heart disease	Weighted median	62	0.289635	0.0477917	1.35819e-09
Average diameter for VLDL particles	Body mass index	Inverse variance weighted	46	-0.0183573	0.0197717	0.353169
Average diameter for VLDL particles	Body mass index	MR Egger	46	0.0355647	0.0313713	0.263072
Average diameter for VLDL particles	Body mass index	Weighted median	46	0.016792	0.0153168	0.27294
Average diameter for VLDL particles	Coronary heart disease	Inverse variance weighted	67	0.0284268	0.0656961	0.665231
Average diameter for VLDL particles	Coronary heart disease	MR Egger	67	-0.18588	0.100954	0.0701506
Average diameter for VLDL particles	Coronary heart disease	Weighted median	67	0.158702	0.0564866	0.00496098

## Sheet: 1f
Supplementary File 1f: Polygenic risk scores association for 125 complex traits with glycoprotein acetyls levels
FDR was calculated based on the associations between 125 PGS and GlycA (n=125).
MR-Base ID	Trait	Subcategory	Beta	SE	P	FDR
Censin_T1D	Type 1 diabetes	Diabetes	0.00380512	0.00344303	0.269091	0.405258
ebi-a-GCST001592	Osteoarthritis	Miscellaneous	0.000231168	0.00380645	0.951574	0.977996
ebi-a-GCST004131	Inflammatory bowel disease	Autoimmune / inflammatory	0.0116305	0.00359239	0.00120616	0.00430772
ebi-a-GCST004132	Crohn's disease	Autoimmune / inflammatory	0.0173	0.00362794	1.85866e-06	1.54888e-05
ebi-a-GCST004133	Ulcerative colitis	Autoimmune / inflammatory	0.00422559	0.00352772	0.230988	0.37498
ebi-a-GCST004420	CTACK levels	Blood biomarker	0.00466576	0.00339318	0.169123	0.285681
ebi-a-GCST004422	Vascular endothelial growth factor levels	Blood biomarker	0.00130644	0.00340484	0.7012	0.819159
ebi-a-GCST004423	Macrophage Migration Inhibitory Factor levels	Blood biomarker	0.00313574	0.00339412	0.355555	0.50505
ebi-a-GCST004424	TRAIL levels	Blood biomarker	0.00113901	0.00338669	0.736632	0.837082
ebi-a-GCST004425	Tumor necrosis factor beta levels	Blood biomarker	0.00539371	0.00341221	0.113948	0.219131
ebi-a-GCST004427	Stromal-cell-derived factor 1 alpha levels	Blood biomarker	0.00767615	0.00338841	0.0234901	0.0624736
ebi-a-GCST004430	Interleukin-16 levels	Blood biomarker	-0.000358218	0.00339433	0.915952	0.97679
ebi-a-GCST004432	Platelet-derived growth factor BB levels	Blood biomarker	0.00837826	0.00339162	0.0135025	0.0392514
ebi-a-GCST004433	Macrophage inflammatory protein 1b levels	Blood biomarker	-0.00139495	0.00340101	0.681691	0.803881
ebi-a-GCST004435	Monokine induced by gamma interferon levels	Blood biomarker	0.00675841	0.00339642	0.0466095	0.104039
ebi-a-GCST004436	Macrophage colony stimulating factor levels	Blood biomarker	0.00159485	0.00339707	0.638729	0.775157
ebi-a-GCST004437	Monocyte chemoattractant protein-3 levels	Blood biomarker	-0.000627668	0.00339022	0.853119	0.934509
ebi-a-GCST004438	Monocyte chemoattractant protein-1 levels	Blood biomarker	0.000265315	0.00339547	0.937718	0.97679
ebi-a-GCST004439	Interleukin-12p70 levels	Blood biomarker	0.00478572	0.00340614	0.160016	0.277806
ebi-a-GCST004440	Interferon gamma-induced protein 10 levels	Blood biomarker	0.00101629	0.00338941	0.764297	0.860695
ebi-a-GCST004441	Interleukin-18 levels	Blood biomarker	0.00208245	0.00339252	0.539326	0.695008
ebi-a-GCST004444	Interleukin-10 levels	Blood biomarker	0.000675446	0.00341131	0.843044	0.932571
ebi-a-GCST004449	Hepatocyte growth factor levels	Blood biomarker	0.00378165	0.0034043	0.266638	0.405258
ebi-a-GCST004454	Interleukin-2 receptor antagonist levels	Blood biomarker	0.00584673	0.0034004	0.0855409	0.17821
ebi-a-GCST004457	Growth-regulated protein alpha levels	Blood biomarker	-0.0038024	0.00339881	0.263252	0.405258
ebi-a-GCST004459	Fibroblast growth factor basic levels	Blood biomarker	-0.000178912	0.00340104	0.958047	0.977996
ebi-a-GCST004460	Eotaxin levels	Blood biomarker	-0.00117505	0.00340146	0.729755	0.836875
ebi-a-GCST004575	Acute insulin response	Diabetes	0.00301669	0.00339366	0.37405	0.519514
ebi-a-GCST004692	Amyotrophic lateral sclerosis	Psychiatric / neurological	0.00467079	0.00338813	0.16803	0.285681
ebi-a-GCST004940	Alanine transaminase levels	Blood biomarker	0.00501046	0.00341724	0.14259	0.258315
ebi-a-GCST004941	Dehydroepiandrosterone sulphate levels	Blood biomarker	-0.00194061	0.00345142	0.573937	0.717422
ebi-a-GCST005059	Serum albumin level	Blood biomarker	-0.00842281	0.00344105	0.0143774	0.040845
ebi-a-GCST005060	Hemoglobin levels	Blood biomarker	0.000834641	0.00340707	0.806478	0.900087
ebi-a-GCST005061	Serum alkaline phosphatase levels	Blood biomarker	0.00987663	0.0033938	0.00361291	0.0115798
ebi-a-GCST005062	Fibrinogen levels	Blood biomarker	0.0219128	0.00342667	1.61619e-10	1.55403e-09
ebi-a-GCST005063	Glomerular filtration rate	Kidney function	0.00251728	0.00340938	0.46031	0.618696
ebi-a-GCST005064	Aspartate aminotransferase levels	Blood biomarker	0.0049642	0.00344639	0.149757	0.267423
ebi-a-GCST005066	Creatinine levels	Kidney function	-0.00196025	0.00342213	0.566772	0.717422
ebi-a-GCST005069	Gamma glutamyl transferase levels	Blood biomarker	0.0159082	0.00347042	4.56929e-06	2.8558e-05
ebi-a-GCST005070	Urea levels	Blood biomarker	-0.00238961	0.00343053	0.486072	0.639569
ebi-a-GCST005071	Insulin-like growth factor 1 levels	Blood biomarker	0.00569134	0.00345611	0.0996133	0.200833
ebi-a-GCST005072	Ferritin levels	Blood biomarker	0.00277296	0.00349004	0.426886	0.580008
ebi-a-GCST005074	Testosterone levels	Blood biomarker	-0.00249575	0.00342876	0.466686	0.620593
ebi-a-GCST005219	Incremental insulin	Diabetes	0.0153043	0.00338872	6.30255e-06	3.75152e-05
ebi-a-GCST005367	Vitamin D levels	Blood biomarker	-6.19516e-05	0.00343863	0.985626	0.985626
ebi-a-GCST006464	Endometrial cancer	Cancer	0.0156115	0.0046093	0.000707331	0.00276301
ebi-a-GCST006862	Asthma	Autoimmune / inflammatory	-0.000325085	0.00340039	0.923837	0.97679
ebi-a-GCST006906	Stroke	Cardiovascular	0.0160822	0.00343197	2.79052e-06	2.05185e-05
ebi-a-GCST006907	Ischemic stroke (large artery atherosclerosis)	Cardiovascular	0.0100261	0.003406	0.00324443	0.0106725
ebi-a-GCST006908	Ischemic stroke	Cardiovascular	0.0132652	0.00343582	0.00011308	0.000487413
ebi-a-GCST006909	Ischemic stroke (small-vessel)	Cardiovascular	0.0163013	0.00342985	2.00968e-06	1.57006e-05
ebi-a-GCST006910	Ischemic stroke (cardioembolic)	Cardiovascular	-0.00175003	0.00339623	0.606353	0.750437
ieu-a-1	Adiponectin	Blood biomarker	-0.00552145	0.00338995	0.103366	0.205091
ieu-a-1002	Leptin	Blood biomarker	0.00544924	0.00340383	0.1094	0.213672
ieu-a-1004	Age at menopause	Miscellaneous	-0.00990471	0.00462953	0.0324035	0.0778931
ieu-a-1005	Percent emphysema	Miscellaneous	0.003547	0.00340274	0.297231	0.437105
ieu-a-1012	Plasma cortisol	Blood biomarker	0.00145515	0.00339214	0.66794	0.802813
ieu-a-1041	Intracranial volume	Psychiatric / neurological	-0.00809665	0.00346549	0.0194746	0.0540962
ieu-a-1042	Nucleus accumbens volume	Psychiatric / neurological	-0.00672942	0.00340153	0.0478923	0.105027
ieu-a-1043	Amygdala volume	Psychiatric / neurological	0.000136913	0.00341813	0.968049	0.977996
ieu-a-1044	Caudate volume	Psychiatric / neurological	-0.00583814	0.00342762	0.0885229	0.181399
ieu-a-1045	Hippocampus volume	Psychiatric / neurological	-0.007568	0.00339202	0.0256758	0.0654994
ieu-a-1046	Pallidum volume	Psychiatric / neurological	-0.00346264	0.00339469	0.307722	0.44213
ieu-a-1047	Putamen volume	Psychiatric / neurological	-0.0085783	0.00339201	0.0114415	0.034052
ieu-a-1048	Thalamus volume	Psychiatric / neurological	-0.00789584	0.0034021	0.020296	0.0551523
ieu-a-1054	Gout	Autoimmune / inflammatory	0.0140992	0.00340973	3.55316e-05	0.000164498
ieu-a-1056	Heart rate	Cardiovascular	0.01563	0.00340367	4.39418e-06	2.8558e-05
ieu-a-1070	Sitting height ratio	Anthropometric	-0.00384529	0.00340191	0.258339	0.405258
ieu-a-1095	Age at menarche	Miscellaneous	-0.0264857	0.00453505	5.24898e-09	4.68659e-08
ieu-a-1097	Microalbuminuria	Kidney function	0.0101758	0.0033888	0.002676	0.00904053
ieu-a-1100	Urinary albumin-to-creatinine ratio	Kidney function	0.00697168	0.00339538	0.0400479	0.0944526
ieu-a-1102	Chronic kidney disease	Kidney function	0.0109296	0.00353623	0.00199711	0.00693441
ieu-a-1104	Serum creatinine (eGFRcrea)	Kidney function	-0.0035376	0.00344114	0.303938	0.44177
ieu-a-1106	Serum cystatin C (eGFRcys)	Kidney function	-0.011433	0.00340229	0.000778692	0.00294959
ieu-a-1120	Ovarian cancer	Cancer	0.00769988	0.00504288	0.126798	0.233084
ieu-a-1125	Endometrioid ovarian cancer	Cancer	-0.0097976	0.00457182	0.0321152	0.0778931
ieu-a-1126	Breast cancer	Cancer	-0.00221248	0.00456251	0.627732	0.769279
ieu-a-1127	ER+ Breast cancer	Cancer	0.000808488	0.0045756	0.859748	0.934509
ieu-a-1128	ER- Breast cancer	Cancer	0.00713739	0.0045669	0.118094	0.223663
ieu-a-2	Body mass index	Anthropometric	0.0483447	0.00339675	6.49794e-46	2.03061e-44
ieu-a-22	Schizophrenia	Psychiatric / neurological	-0.00611946	0.00352169	0.082276	0.174314
ieu-a-275	Red blood cell count	Cardiovascular	0.000280079	0.00342619	0.934848	0.97679
ieu-a-276	Celiac disease	Autoimmune / inflammatory	-0.00751312	0.0034486	0.0293643	0.0734107
ieu-a-28	Infant head circumference	Anthropometric	-0.0088294	0.00342691	0.0099825	0.0311953
ieu-a-29	Birth length	Anthropometric	-0.0148309	0.00339765	1.27247e-05	6.62743e-05
ieu-a-45	Anorexia nervosa	Psychiatric / neurological	-0.00222456	0.00347291	0.52182	0.679453
ieu-a-48	Hip circumference	Anthropometric	0.0227733	0.00340735	2.3462e-11	2.66613e-10
ieu-a-60	Waist circumference	Anthropometric	0.0565248	0.00339955	5.56874e-62	2.32031e-60
ieu-a-7	Coronary heart disease	Cardiovascular	0.0418116	0.00340132	1.06114e-34	2.65284e-33
ieu-a-72	Waist-to-hip ratio	Anthropometric	0.0626557	0.00343052	2.2248e-74	1.3905e-72
ieu-a-798	Myocardial infarction	Cardiovascular	0.0357281	0.00340218	8.81818e-26	1.37784e-24
ieu-a-803	PGC cross-disorder traits	Psychiatric / neurological	-0.00405491	0.00363231	0.264279	0.405258
ieu-a-806	Autism	Psychiatric / neurological	-0.00678238	0.00339738	0.0458983	0.104039
ieu-a-813	Alcohol dependence	Miscellaneous	0.00358741	0.00342741	0.295249	0.437105
ieu-a-822	Pancreatic cancer	Cancer	0.00123605	0.00339898	0.716117	0.828839
ieu-a-832	Rheumatoid arthritis	Autoimmune / inflammatory	0.0122004	0.00340316	0.000337234	0.00135981
ieu-a-93	Overweight	Anthropometric	0.0381703	0.00339024	2.19816e-29	4.57949e-28
ieu-a-965	Lung adenocarcinoma	Cancer	0.00684973	0.0034102	0.0445827	0.103201
ieu-a-966	Lung cancer	Cancer	0.0157002	0.00338204	3.45177e-06	2.39706e-05
ieu-a-967	Squamous cell lung cancer	Cancer	0.00869237	0.00340723	0.0107384	0.0327389
ieu-a-975	Paget's disease	Miscellaneous	0.000394582	0.0035591	0.911723	0.97679
ieu-a-990	Bulimia nervosa	Psychiatric / neurological	-0.00141119	0.00340555	0.678597	0.803881
ieu-a-996	Eczema	Autoimmune / inflammatory	0.00489489	0.0034412	0.154904	0.272718
ieu-a-999	Body fat	Anthropometric	0.0151114	0.00339475	8.54249e-06	4.85369e-05
ieu-b-17	Juvenile myoclonic epilepsy	Psychiatric / neurological	0.00393098	0.00352262	0.264458	0.405258
ieu-b-2	Alzheimer's disease	Psychiatric / neurological	0.00310382	0.00341174	0.362958	0.509773
ieu-b-35	C-Reactive protein levels	Blood biomarker	0.0778873	0.00340293	1.37391e-115	1.71739e-113
ieu-b-41	Bipolar disorder	Psychiatric / neurological	0.00195672	0.00346948	0.572768	0.717422
ieu-b-43	Frontotemporal dementia (TDP subtype)	Psychiatric / neurological	-0.0069899	0.0036388	0.0547434	0.117981
ieu-b-7	Parkinson's disease	Psychiatric / neurological	-0.00443204	0.00339412	0.191625	0.315453
ieu-b-8	Epilepsy	Psychiatric / neurological	0.00461127	0.00353274	0.191795	0.315453
ieu-b-85	Prostate cancer	Cancer	-0.00432842	0.00504365	0.390792	0.536802
ieu-b-9	Generalized epilepsy	Psychiatric / neurological	0.000132155	0.00353424	0.970172	0.977996
ieu-b-90	Oral cavity and pharyngeal cancer	Cancer	0.0140039	0.00340001	3.81261e-05	0.000170206
ieu-b-94	Oral cancer	Cancer	0.0125609	0.00385896	0.00113437	0.00417047
ieu-b-97	Oropharyngeal cancer	Cancer	0.0076934	0.00342487	0.024685	0.064284
Lagou_FG	Fasting glucose	Diabetes	0.0126263	0.00340049	0.000204875	0.000853644
Lagou_FI	Fasting insulin	Diabetes	-0.0224884	0.0033964	3.58307e-11	3.73237e-10
Liu_CigarettesPerDay	Cigarettes per day	Miscellaneous	0.0148065	0.00341661	1.46809e-05	7.34047e-05
Liu_DrinksPerWeek	Drinks per week	Miscellaneous	-0.00548325	0.00354542	0.12197	0.227556
Liu_SmokingCessation	Smoking cessation	Miscellaneous	0.0145246	0.00348173	3.02681e-05	0.00014552
Liu_SmokingInitiation	Smoking initation	Miscellaneous	0.0263676	0.00359519	2.25151e-13	2.81438e-12
Mahajan_T2D	Type 2 diabetes	Diabetes	0.0375199	0.00338756	1.7211e-28	3.07339e-27
Walford_ISI	Insulin sensitivity index	Diabetes	-0.0149968	0.00337864	9.06126e-06	4.9246e-05
Wheeler_HbA1c	HbA1c	Diabetes	0.0282856	0.00339865	8.73286e-17	1.2129e-15

## Sheet: 1g
Supplementary File 1g: Mendelian randomization results for complex traits and disease liability with glycoprotein acetyls as an outcome
Exposure	Outcome	MR Method	nSNPs	Beta	SE	P	F	FDR
Cigarettes per day	GlycA	Inverse variance weighted	8	0.273618	0.0366949	8.87955e-14	108.683	1.59832e-12
Body mass index	GlycA	Inverse variance weighted	79	0.16009	0.0261984	9.92076e-10	65.565	1.58732e-08
Waist circumference	GlycA	Inverse variance weighted	46	0.168661	0.0305775	3.47103e-08	59.4981	3.70243e-07
HbA1c	GlycA	Inverse variance weighted	37	0.321059	0.0761376	2.47766e-05	76.8938	0.000158571
Overweight	GlycA	Inverse variance weighted	14	0.0705862	0.0166948	2.35751e-05	61.5596	0.000158571
C-Reactive protein level	GlycA	Inverse variance weighted	55	0.152941	0.0523721	0.00349721	180.246	0.0186518
Waist-to-hip ratio	GlycA	Inverse variance weighted	30	0.191395	0.0671585	0.00437332	45.2516	0.0199923
Inflammatory bowel disease	GlycA	Inverse variance weighted	105	0.0162569	0.00603404	0.00705596	70.4982	0.0282238
Type 2 diabetes	GlycA	Inverse variance weighted	99	0.0375038	0.0193897	0.053087	68.3458	0.188754
Age at menarche	GlycA	Inverse variance weighted	60	-0.0363475	0.0216706	0.0934901	88.7994	0.299168
Coronary heart disease	GlycA	Inverse variance weighted	39	-0.0354982	0.0238242	0.136222	61.8817	0.363258
Myocardial infarction	GlycA	Inverse variance weighted	25	-0.0468944	0.0306157	0.125593	60.6998	0.363258
Crohn's disease	GlycA	Inverse variance weighted	83	0.00662264	0.00506105	0.190687	79.0121	0.469382
Smoking initiation	GlycA	Inverse variance weighted	10	0.0826508	0.0647106	0.201518	36.1825	0.483644
Chronic kidney disease	GlycA	Inverse variance weighted	4	0.0569778	0.0525965	0.278676	63.2309	0.636974
Birth length	GlycA	Inverse variance weighted	2	-0.0577746	0.0585259	0.323563	30.8839	0.690268
Fasting insulin	GlycA	Inverse variance weighted	13	0.328	0.482671	0.496789	42.1605	0.836697
Heart rate	GlycA	Inverse variance weighted	15	0.00235425	0.00323172	0.466318	60.2221	0.836697
Ischemic stroke	GlycA	Inverse variance weighted	9	-0.0229227	0.0326581	0.482743	40.7406	0.836697
Ischemic stroke (large artery atherosclerosis)	GlycA	Inverse variance weighted	4	0.0209047	0.0258366	0.418452	37.296	0.836697
Body fat	GlycA	Inverse variance weighted	10	0.0451784	0.116953	0.699277	44.5276	0.868965
Endometrial cancer	GlycA	Inverse variance weighted	16	-0.00254235	0.0110604	0.8182	44.197	0.868965
Fasting glucose	GlycA	Inverse variance weighted	41	0.0209676	0.0733603	0.775018	120.466	0.868965
Gout	GlycA	Inverse variance weighted	2	0.00452826	0.0179011	0.8003	128.53	0.868965
Hip circumference	GlycA	Inverse variance weighted	49	0.0184825	0.0415109	0.656143	49.9982	0.868965
Microalbuminuria	GlycA	Wald ratio	1	0.0102981	0.0283261	0.71619	41.6233	0.868965
Rheumatoid arthritis	GlycA	Inverse variance weighted	40	0.00227022	0.00608535	0.709102	125.231	0.868965
Serum alkaline phosphatase levels	GlycA	Wald ratio	1	-0.0349208	0.174972	0.84181	100	0.868965
Serum cystatin C (eGFRcys)	GlycA	Inverse variance weighted	5	-0.0618805	0.118249	0.600761	223.703	0.868965
Stroke	GlycA	Inverse variance weighted	8	-0.0164109	0.0400144	0.681714	41.809	0.868965
Smoking cessation	GlycA	Inverse variance weighted	5	0.0382639	0.128141	0.76524	38.9485	0.891328
Lung cancer	GlycA	Inverse variance weighted	5	0.00475695	0.0422165	0.910284	81.8027	0.910284

## Sheet: 1h
Supplementary File 1h: Mendelian randomization results using weighted median and MR-Egger for complex traits and disease liability with glycoprotein acetyls as an outcome
Exposure	Outcome	MR Method	nSNPs	Beta	SE	P	Egger intercept	Egger intercept SE	Egger intercept pval
Body mass index	GlycA	MR Egger	79	0.0395127	0.0624574	0.528847	0.00366362	0.00173052	0.0374841
Body mass index	GlycA	Weighted median	79	0.142367	0.0305778	3.22587e-06	NA	NA	NA
C-Reactive protein level	GlycA	MR Egger	55	-0.017715	0.0714668	0.805187	0.013149	0.00405874	0.00206896
C-Reactive protein level	GlycA	Weighted median	55	-0.0412003	0.0181071	0.0228837	NA	NA	NA
Cigarettes per day	GlycA	MR Egger	8	0.223851	0.0750885	0.0245997	0.00254838	0.00335457	0.476227
Cigarettes per day	GlycA	Weighted median	8	0.246949	0.0457573	6.77881e-08	NA	NA	NA
HbA1c	GlycA	MR Egger	37	0.198394	0.141754	0.170444	0.00278061	0.00271126	0.312126
HbA1c	GlycA	Weighted median	37	0.188398	0.0687509	0.00613826	NA	NA	NA
Inflammatory bowel disease	GlycA	MR Egger	105	0.0206566	0.0140836	0.1455	-0.000603397	0.00174356	0.729995
Inflammatory bowel disease	GlycA	Weighted median	105	0.0126582	0.00727608	0.0819118	NA	NA	NA
Overweight	GlycA	MR Egger	14	0.054458	0.0587987	0.372606	0.00138262	0.00481706	0.778988
Overweight	GlycA	Weighted median	14	0.0449023	0.0218144	0.0395534	NA	NA	NA
Waist circumference	GlycA	MR Egger	46	0.11667	0.0819059	0.161373	0.0015851	0.00231438	0.497005
Waist circumference	GlycA	Weighted median	46	0.150453	0.0364369	3.64113e-05	NA	NA	NA
Waist-to-hip ratio	GlycA	MR Egger	30	-0.241256	0.296218	0.42226	0.0109054	0.00728016	0.145333
Waist-to-hip ratio	GlycA	Weighted median	30	0.184435	0.0646722	0.00434663	NA	NA	NA

## Sheet: 1i
Supplementary File 1i: Genetic instruments for glycoprotein acetyls
SNP	CHR	effect_allele	other_allele	eaf	beta	se	pval
rs6424109	1	C	A	0.125431	-0.035818	0.00615425	5.9e-09
rs182050989	1	C	T	0.97186	-0.072954	0.0123611	3.6e-09
rs12239736	1	T	A	0.658766	0.0389781	0.00434348	2.9e-19
rs7535218	1	A	T	0.364131	-0.0317199	0.00426385	1e-13
rs12032372	1	T	C	0.790853	0.0302589	0.00500256	1.5e-09
rs12073837	1	C	T	0.722845	0.0257223	0.0045441	1.5e-08
rs56188865	1	T	C	0.627785	0.0284892	0.00423459	1.7e-11
rs676210	2	G	A	0.794234	0.0280863	0.00503333	2.4e-08
rs1260326	2	T	C	0.396018	0.101134	0.00417205	8.2e-130
rs6732543	2	C	T	0.148056	0.0313803	0.0057415	4.6e-08
rs6734238	2	A	G	0.597083	-0.0246657	0.00416209	3.1e-09
rs62259939	3	G	A	0.565171	-0.0252705	0.00411788	8.4e-10
rs79287178	3	G	A	0.968897	-0.0987584	0.0123737	1.4e-15
rs2070634	3	T	G	0.485682	-0.0372031	0.00410331	1.2e-19
rs13108218	4	A	G	0.384645	0.0387648	0.00422617	4.6e-20
rs7697204	4	C	T	0.258837	-0.030636	0.00467497	5.6e-11
rs6452937	5	A	G	0.860604	0.0328491	0.00591352	2.8e-08
rs72801474	5	G	A	0.907336	0.0421732	0.00704856	2.2e-09
rs1801020	5	A	G	0.252839	-0.0266138	0.00472029	1.7e-08
rs1005599	6	G	C	0.289198	-0.0533982	0.00452927	4.4e-32
rs9270074	6	T	C	0.15578	-0.0480433	0.00565148	1.9e-17
rs12208357	6	C	T	0.93	-0.0473486	0.00802661	3.7e-09
rs117733303	6	A	G	0.9815	0.121193	0.0151418	1.2e-15
rs10455872	6	A	G	0.921013	0.0776147	0.00756625	1.1e-24
rs147440796	7	T	C	0.967131	-0.0815369	0.0129826	3.4e-10
rs62466318	7	C	T	0.7958	0.0852219	0.00508542	4.9e-63
rs6601299	8	T	C	0.100719	-0.0670658	0.00679004	5.2e-23
rs117026536	8	G	T	0.900082	0.0881344	0.00680344	2.2e-38
rs59296513	8	G	A	0.679585	0.0244266	0.00440261	2.9e-08
rs55780214	8	T	A	0.712316	0.0319041	0.00453733	2e-12
rs112875651	8	G	A	0.607621	0.0710206	0.00423932	5.4e-63
rs113354603	9	G	A	0.929269	-0.12804	0.00847641	1.5e-51
rs687621	9	A	G	0.681106	-0.0298858	0.0043802	8.9e-12
rs7924036	10	G	T	0.495759	0.0277936	0.00408211	9.9e-12
rs2497337	10	C	T	0.487178	-0.0237778	0.00409817	6.6e-09
rs964184	11	G	C	0.13274	0.10555	0.00601795	7.2e-69
rs141469619	11	A	G	0.989859	-0.129449	0.0215708	2e-09
rs12421055	11	A	C	0.752796	-0.0270306	0.00475009	1.3e-08
rs78689694	11	G	C	0.866653	-0.0352698	0.00603159	5e-09
rs56205943	12	G	A	0.761327	0.0269128	0.00477592	1.7e-08
rs17105232	14	G	A	0.752225	-0.0301066	0.0047594	2.5e-10
rs28929474	14	C	T	0.980027	0.28097	0.0146277	3.2e-82
rs150844304	15	A	C	0.974329	-0.0731027	0.0129218	1.5e-08
rs1132812	16	A	G	0.480755	0.0232252	0.00408735	1.3e-08
rs143578173	16	C	T	0.971703	0.139119	0.0126671	4.6e-28
rs2278028	16	G	A	0.987011	0.122245	0.0183977	3e-11
rs77303550	16	C	T	0.807295	-0.164358	0.00517872	1e-200
rs535412039	16	C	T	0.984063	-0.099811	0.0175801	1.4e-08
rs117155836	16	G	A	0.971594	-0.137117	0.012251	4.4e-29
rs151083835	16	C	G	0.980106	-0.102118	0.0148853	6.9e-12
rs1801689	17	A	C	0.969474	0.0729028	0.0118713	8.2e-10
rs116843064	19	G	A	0.980149	0.0993193	0.0146518	1.2e-11
rs58542926	19	C	T	0.925601	0.056681	0.00778845	3.4e-13
rs2445818	19	A	G	0.0676327	-0.0445223	0.00811585	4.1e-08
rs59774409	19	C	T	0.916937	-0.0860381	0.0073788	2e-31
rs62128087	19	C	T	0.838903	0.0409116	0.00561732	3.3e-13
rs149807892	19	C	T	0.984177	0.120812	0.0165799	3.2e-13
rs4297946	20	G	C	0.531439	-0.0224276	0.00409227	4.2e-08
rs2294915	22	C	T	0.7682	0.0335143	0.00484791	4.7e-12

## Sheet: 1j
Supplementary File 1j: Mendelian randomization results with glycoprotein acetyls as our exposure and complex traits/diseases as our outcome
Exposure	Outcome	MR Method	nSNPs	Beta	SE	P	FDR
GlycA	C-Reactive protein level || id:ieu-b-35	Inverse variance weighted	31	0.294941	0.0969407	0.0023463	0.0915056
GlycA	Fasting glucose || id:Lagou_FG	Inverse variance weighted	41	0.0721069	0.0276728	0.00916884	0.0969586
GlycA	Fasting insulin || id:Lagou_FI	Inverse variance weighted	41	0.0608621	0.0236105	0.00994447	0.0969586
GlycA	Inflammatory bowel disease	Inverse variance weighted	45	0.188032	0.0719307	0.00894687	0.0969586
GlycA	Microalbuminuria || id:ieu-a-1097	Inverse variance weighted	31	0.203001	0.0975429	0.0374202	0.291878
GlycA	Age at menarche || id:ieu-a-1095	Inverse variance weighted	31	0.0430075	0.025116	0.0868317	0.449376
GlycA	HbA1c || id:Wheeler_HbA1c	Inverse variance weighted	16	-0.0402648	0.0223779	0.07197	0.449376
GlycA	Waist-to-hip ratio || id:ieu-a-72	Inverse variance weighted	34	0.0364338	0.0216351	0.0921798	0.449376
GlycA	Fibrinogen levels || id:ebi-a-GCST005062	Inverse variance weighted	27	0.0492389	0.0314528	0.11747	0.509036
GlycA	Heart rate || id:ieu-a-1056	Inverse variance weighted	32	0.373099	0.253973	0.141819	0.553095
GlycA	Crohn's disease || id:ebi-a-GCST004132	Inverse variance weighted	52	0.161546	0.114457	0.158121	0.56061
GlycA	Oral cavity cancer || id:ieu-b-94	Inverse variance weighted	53	-0.23167	0.176699	0.189823	0.616926
GlycA	Putamen volume || id:ieu-a-1047	Inverse variance weighted	50	25.7485	23.5047	0.273315	0.691066
GlycA	Birth length || id:ieu-a-29	Inverse variance weighted	29	-0.0383037	0.0434147	0.377628	0.742854
GlycA	Coronary heart disease || id:ieu-a-7	Inverse variance weighted	55	0.0931136	0.0855523	0.276426	0.742854
GlycA	Gamma glutamyl transferase levels || id:ebi-a-GCST005069	Inverse variance weighted	30	0.0269456	0.0307547	0.380951	0.742854
GlycA	Insulin sensitivity index || id:Walford_ISI	Inverse variance weighted	12	-0.0877103	0.0921138	0.340998	0.742854
GlycA	Myocardial infarction || id:ieu-a-798	Inverse variance weighted	55	0.0844227	0.0872825	0.333427	0.742854
GlycA	Oral cavity and pharyngeal cancer || id:ieu-b-90	Inverse variance weighted	53	0.147621	0.156666	0.346055	0.742854
GlycA	SmokingInitiationnoUKB	Inverse variance weighted	49	0.0259929	0.0237307	0.273373	0.742854
GlycA	Waist circumference || id:ieu-a-60	Inverse variance weighted	34	0.0207107	0.0223119	0.353285	0.742854
GlycA	Body fat || id:ieu-a-999	Inverse variance weighted	34	0.0189982	0.0256917	0.459623	0.814787
GlycA	Gout || id:ieu-a-1054	Inverse variance weighted	32	0.153018	0.200105	0.444457	0.814787
GlycA	Ischemic stroke || id:ebi-a-GCST006908	Inverse variance weighted	57	-0.0265086	0.0408694	0.516587	0.860081
GlycA	Stroke || id:ebi-a-GCST006906	Inverse variance weighted	57	-0.0247861	0.039399	0.52928	0.860081
GlycA	Type 2 diabetes	Inverse variance weighted	56	0.0382123	0.065152	0.557533	0.869751
GlycA	Rheumatoid arthritis || id:ieu-a-832	Inverse variance weighted	41	-0.0490427	0.0988424	0.619774	0.895229
GlycA	Serum alkaline phosphatase levels || id:ebi-a-GCST005061	Inverse variance weighted	13	0.0195679	0.0379335	0.60596	0.895229
GlycA	Chronic kidney disease || id:ieu-a-1102	Inverse variance weighted	31	0.0310007	0.0840411	0.712221	0.91448
GlycA	Endometrial cancer || id:ebi-a-GCST006464	Inverse variance weighted	56	-0.0268783	0.0687673	0.695902	0.91448
GlycA	Hip circumference || id:ieu-a-48	Inverse variance weighted	34	-0.0066698	0.0259604	0.797239	0.91448
GlycA	Incremental insulin || id:ebi-a-GCST005219	Inverse variance weighted	31	-0.0431869	0.102358	0.673083	0.91448
GlycA	Ischemic stroke (large artery atherosclerosis) || id:ebi-a-GCST006907	Inverse variance weighted	56	-0.0295397	0.112128	0.792206	0.91448
GlycA	Lung cancer || id:ieu-a-966	Inverse variance weighted	52	-0.0225041	0.0735963	0.759774	0.91448
GlycA	Overweight || id:ieu-a-93	Inverse variance weighted	32	-0.0162971	0.0482999	0.735804	0.91448
GlycA	Infant head circumference || id:ieu-a-28	Inverse variance weighted	31	-0.00891745	0.0730008	0.902776	0.940392
GlycA	Squamous cell lung cancer || id:ieu-a-967	Inverse variance weighted	52	-0.0186719	0.115543	0.87162	0.940392
GlycA	Body mass index || id:ieu-a-2	Inverse variance weighted	34	-0.00336552	0.0224114	0.880631	0.941284
GlycA	Cigarettes Per Day (noUKB) || id:Liu_CigarettesPerDay	Inverse variance weighted	49	0.0028502	0.0148657	0.847954	0.941284
GlycA	Ischemic stroke (small-vessel) || id:ebi-a-GCST006909	Inverse variance weighted	57	0.0117635	0.0874654	0.893013	0.941284
GlycA	Serum cystatin C (eGFRcys) || id:ieu-a-1106	Inverse variance weighted	31	0.000167733	0.0112672	0.988122	0.988122
GlycA	SmokingCessationnoUKB	Inverse variance weighted	49	-0.000727121	0.0272918	0.978745	0.988122

[truncated: 8 more sheets: 1k, 1l, 1m, 1n, 1o, 1p, 1q, 1r]
